# Supplementary material for: Genetic architecture and regulatory impact on hepatic microRNA expression linked to immune and metabolic traits
Source: Open Biol. 2017 Nov 8;7(11):170101. doi: 10.1098/rsob.170101 (PMC5717336; doi:10.1098/rsob.170101)
Supplement: Table S2 [file rsob170101supp2.xlsx]

## Sheet: Tabelle1
Electronic supplementary material
Siriluck Ponsuksili, Nares Trakooljul, Frieder Hadlich, Fiete Haack, Eduard Murani, and Klaus Wimmers
Genetic architecture and regulatory impact on hepatic microRNA expression linked to immune and metabolic traits
Open Biology
DOI: 10.1098/rsob.2016
Table S2:
Correlation coefficients between miRNAs and biochemical traits
Sequence	Phenotype	r_miR	pvalue_miR	fdr_miR	Probe_ID	SSC_chromosome_miR	SSC_position_miR	miR_SSC	ID_ssc
UUAAUGCUAAUUGUGAUAGGGGU	ALB	-0.23859	0.00051948	0.0111043	mmu_miR_155_st	NW_003613383.1	133231
UAGCUUAUCAGACUGAUGUUGACU	ALB	-0.237276	0.00055887	0.0117288	bta_miR_21_st	12	37340402
UUAAUGCUAAUCGUGAUAGGGGU	ALB	-0.227061	0.00097314	0.0169056	bta_miR_155_st;cfa_miR_155_st;eca_miR_155_st;hsa_miR_155_st;mml_miR_155_st;oan_miR_155_st;ppy_miR_155_st;ptr_miR_155_st	NW_003613383.1	133231
UAGCUUAUCAGACUGAUGUUGA	ALB	-0.222122	0.00126168	0.0200777	age_miR_21_st;cfa_miR_21_st;cgr_miR_21_st;eca_miR_21_st;gga_miR_21_st;ggo_miR_21_st;hsa_miR_21_st;mdo_miR_21_st;mml_miR_21_st;mmu_miR_21_st;mne_miR_21_st;oan_miR_21_st;ppa_miR_21_st;ppy_miR_21_st;ptr_miR_21_st;rno_miR_21_st;ssc_miR_21_st;tgu_miR_21_st	12	37340402	ssc-miR-21	MIMAT0002165
UCAGUGCAUGACAGAACUUGGG	ALB	-0.212113	0.00209959	0.0279825	bta_miR_152_st;mdo_miR_152_st	12	24289550
UCAGUGCAUGACAGAACUUGG	ALB	-0.211497	0.00216484	0.0284432	cfa_miR_152_st;hsa_miR_152_st;mml_miR_152_st;mmu_miR_152_st;ptr_miR_152_st;rno_miR_152_st;ssc_miR_152_st	12	24289551	ssc-miR-152	MIMAT0013887
UCAGUGCAUGACAGAACUUUGG	ALB	-0.211151	0.00220231	0.0287541	dre_miR_152_st	12	24289550
UGAGAACUGAAUUCCAUGGGUU	ALB	-0.209946	0.00233747	0.0298251	cfa_miR_146a_st;eca_miR_146a_st;gga_miR_146a_st;hsa_miR_146a_st;mdo_miR_146a_st;mml_miR_146a_st;mmu_miR_146a_st;ppy_miR_146a_st;ptr_miR_146a_st;rno_miR_146a_st;tgu_miR_146c_st	16	68394566	ssc-miR-146a-5p	MIMAT0022963
UGAGGUAGUAGUUUGUGCUGUU	ALB	-0.208094	0.00255988	0.0314787	bta_let_7i_st;dre_let_7i_st;fru_let_7i_st;hsa_let_7i_st;mml_let_7i_st;mmu_let_7i_st;ppy_let_7i_st;ptr_let_7i_st;rno_let_7i_st;tgu_let_7i_st;tni_let_7i_st	5	30021229
UGCAGUGACGUCUCUUCCCC	ALB	-0.205523	0.00290052	0.0340884	gga_miR_2128_st	5	3711911
CAAAGUGCUCAUAGUGCAGGUAG	ALB	-0.203665	0.00317168	0.0362532	eca_miR_20b_st;gga_miR_20b_st;hsa_miR_20b_st;mml_miR_20b_st;mmu_miR_20b_st;oan_miR_20b_st;ppy_miR_20b_st;ptr_miR_20b_st;rno_miR_20b_5p_st;tgu_miR_20b_st;xla_miR_20_st;xtr_miR_20b_st	X	126199822
UCAGUGCAUGACAGAACUUGA	ALB	-0.199171	0.00392504	0.0417338	pma_miR_152a_st	12	24289551
UAAAGUGCUUAUAGUGCAGGUA	ALB	-0.198224	0.00410302	0.0429512	age_miR_20_st;ggo_miR_20_st;lca_miR_20_st;lla_miR_20_st;mml_miR_20a_st;mne_miR_20_st;ppa_miR_20_st;ppy_miR_20_st;ptr_miR_20a_st;sla_miR_20_st;ssc_miR_20_st	11	66610520	ssc-miR-20a	MIMAT0002129
AGUGAGGAGGCCGGGGCCGCU	ALB	0.193089	0.00520059	0.0497425	osa_miR1846a_5p_st;osa_miR1846b_5p_st;osa_miR1846c_5p_st	12	3767152
GGGGCUGGGGCCGGGGCCGAGC	ALB	0.193562	0.00508968	0.0491433	hsa_miR_762_st;ptr_miR_762_st	8	1092756
GGGUCCCGGGGAGGGGGG	ALB	0.194294	0.00492186	0.048085	hsa_miR_4281_st	1	304359153
GAGACUGGGGUGGGGCC	ALB	0.19432	0.00491597	0.0480597	hsa_miR_4463_st	15	39299444
UCAAGAGCAAUAACGAAAAAUG	ALB	0.194596	0.00485408	0.047735	ssc_miR_335_st	18	19338044	ssc-miR-335	MIMAT0013955
GGGUGGUGGUGGAAGUCGGGG	ALB	0.195354	0.00468758	0.0467	ame_miR_3751_st	9	72425610
GAGGGAGGGACGGGGGCGGUGC	ALB	0.195633	0.00462757	0.0463159	mmu_miR_149_star_st	15	154447033
GGGGGCGGUGGGGGGCGGGG	ALB	0.195847	0.00458218	0.0459579	bta_miR_1777b_st	6	827723
GGGGGGCAGGAGGGGCUCAGGG	ALB	0.198027	0.00414087	0.0432012	mmu_miR_328_star_st	6	25134129
GGCCGGGGGACGGGCUGGGA	ALB	0.199236	0.00391309	0.0416603	peu_miR2911_st	12	46773536
CGUGGUGGUGGGGGUGGGG	ALB	0.20151	0.00351496	0.0387699	tca_miR_3897_3p_st	12	36204128
AAACGAACAAAAAACUGAUGG	ALB	0.201876	0.00345431	0.0382882	ath_miR837_3p_st	9	123038842
UCAAGAGCAAUAACGAAAAAUGU	ALB	0.202493	0.00335444	0.0375769	cfa_miR_335_st;eca_miR_335_st;hsa_miR_335_st;mml_miR_335_st;mmu_miR_335_5p_st;ppy_miR_335_st;ptr_miR_335_st;rno_miR_335_st	18	19338043
AGGGGCGGGAGGGGUCGGGC	ALB	0.204241	0.00308521	0.0355152	gga_miR_1607_st	2	339014
ACCUUCCAAAAAAGCACUC	ALB	0.204389	0.00306336	0.0353287	tca_miR_3877_5p_st	NW_003539163.2	9193
UGGGGGCGGUGGGGGGCGGG	ALB	0.20553	0.00289955	0.0340861	bta_miR_1777a_st	4	41993746
GCGGGCGGGGCCGGGGGCGGGG	ALB	0.205679	0.00287873	0.0339069	mmu_miR_5126_st	6	58229492
GGCGGGUGCGGGGGUGG	ALB	0.205798	0.00286222	0.033765	hsa_miR_3656_st	2	2788698
CGCGGGUCGGGGUCUGCAGG	ALB	0.206004	0.00283378	0.033563	hsa_miR_3621_st	8	1462207
GCGGGGCUGGGCGCGCG	ALB	0.208006	0.00257093	0.0315443	hsa_miR_4508_st	16	81833047
CGGGGCGGCAGGGGCCUC	ALB	0.208773	0.00247621	0.0308643	hsa_miR_3196_st	13	216417897
UUGGGGCUGGGGAGAGGCGGG	ALB	0.20903	0.00244512	0.030702	bta_miR_2374_st	2	84019374
GUGGGUUGGGGGCGGGGG	ALB	0.209095	0.00243732	0.0306817	oan_miR_1346_st	1	11400988
GUGGGUACGGCCCAGUGGGGGG	ALB	0.209528	0.00238597	0.0302149	hsa_miR_1225_5p_st;ppy_miR_1225_5p_st	3	42283711
CCCGGGGCGCCCGAGGGG	ALB	0.209886	0.00234428	0.0298945	oan_miR_1394_st	NW_003538861.2	34944
GGGUGCGGGCCGGCGGGG	ALB	0.210259	0.00230166	0.0295144	hsa_miR_4466_st	14	53692931
GGGGCGGGGGGGCGGGUG	ALB	0.210302	0.00229669	0.0294852	bta_miR_2881_st	12	12717988
UGGGGAGCGGCCCCCGGGCGGG	ALB	0.212218	0.00208863	0.027936	bta_miR_1343_st	2	28433229
UGCAGGUGAUGGCGGGGCUG	ALB	0.214709	0.00184372	0.0258432	gga_miR_1636_st	9	592436
GCCGGCGGGAGCCCCAGGGAG	ALB	0.215209	0.00179783	0.0254287	mmu_miR_2137_st	1	2924027
GUGGGUUGGGGCGGGCUCUG	ALB	0.216175	0.00171209	0.0245655	hsa_miR_3940_5p_st	10	20142288
CUCCGGGACGGCUGGGC	ALB	0.217229	0.00162285	0.023761	hsa_miR_4497_st	13	109189893
CGGCGCGACCGGCCCGGGG	ALB	0.217939	0.00156519	0.0231545	hsa_miR_4634_st	14	28290047
AGGGAGGGACGGGGGCUGUGC	ALB	0.219621	0.00143587	0.0220559	hsa_miR_149_star_st	15	154447033
CGCGCCGGGCCCGGGUU	ALB	0.222198	0.00125666	0.0200416	hsa_miR_3195_st	17	41206838
AGGGGGCGGGCUCCGGCG	ALB	0.2236	0.00116803	0.0190585	hsa_miR_4488_st	17	67586529
CGGGGGUGGCGGGGAGGGGG	ALB	0.224718	0.0011015	0.0183494	bta_miR_2305_st	NW_003541294.1	709
UGGGGCGGAGCUUCCGGAG	ALB	0.230237	0.00082111	0.0150923	hsa_miR_3180_st	8	87201639
ACUGUAUGUGAAAAAAUAUG	ALB	0.234031	0.00066827	0.0131545	cin_miR_4124_5p_st	3	77801034
UUAAUGCUAAUUGUGAUAGGGGU	BUN	-0.258518	0.00016311	0.00501787	mmu_miR_155_st	NW_003613383.1	133231
UAAGGUGCAUCUAGUGCAGAUAG	BUN	-0.217201	0.00162517	0.023779	eca_miR_18a_st;hsa_miR_18a_st;mmu_miR_18a_st;pma_miR_18a_st;rno_miR_18a_st;xtr_miR_18a_st	11	66610208
UUAAUGCUAAUCGUGAUAGGGGU	BUN	-0.214061	0.00190475	0.0264047	bta_miR_155_st;cfa_miR_155_st;eca_miR_155_st;hsa_miR_155_st;mml_miR_155_st;oan_miR_155_st;ppy_miR_155_st;ptr_miR_155_st	NW_003613383.1	133231
UAAGGUGCAUCUAGUGCAGAUA	BUN	-0.213566	0.00195259	0.0268468	age_miR_18_st;bta_miR_18a_st;cfa_miR_18a_st;dre_miR_18a_st;fru_miR_18_st;gga_miR_18a_st;ggo_miR_18_st;lca_miR_18_st;lla_miR_18_st;mdo_miR_18_st;mml_miR_18_st;mne_miR_18_st;ppa_miR_18_st;ppy_miR_18_st;ptr_miR_18a_st;sla_miR_18_st;ssc_miR_18a_st;tgu_miR_18a_st;tni_miR_18_st	11	66610208	ssc-miR-18a	MIMAT0002161
AGGAAGCCCUGGAGGGGCUGGAG	BUN	-0.205338	0.00292659	0.0342935	bta_miR_671_st;eca_miR_671_5p_st;hsa_miR_671_5p_st;mml_miR_671_5p_st;mmu_miR_671_5p_st;ppy_miR_671_5p_st	18	6286740
AGCACCAUUUGAAAUCAGUGCUU	BUN	0.195764	0.00459977	0.0461009	bfl_miR_29b_st	9	148552490
UAGCACCAUUUGAAAUCAGUGUU	BUN	0.197368	0.00426997	0.0439612	bta_miR_29b_st;cfa_miR_29b_st;eca_miR_29b_st;gga_miR_29b_st;hsa_miR_29b_st;mml_miR_29b_st;mmu_miR_29b_st;rno_miR_29b_st;xtr_miR_29b_st	18	19034872	ssc-miR-29b	MIMAT0002137
AGACAAAAAUAUAAAUAACAAA	BUN	0.199755	0.00381883	0.0409957	osa_miR2923_st	X	61287294
ACAAAAAAAAAAGCCCAACCCUUC	BUN	0.20599	0.00283569	0.033563	hsa_miR_3613_3p_st	NW_003613303.1	118414
UAGCACCAUCUGAAAUCGGUUA	BUN	0.209785	0.00235602	0.0300006	cfa_miR_29a_st;eca_miR_29a_st;hsa_miR_29a_st;mmu_miR_29a_st;rno_miR_29a_st	18	19035277
GUCCAGUUUUCCCAGGAAUCCC	BUN	0.216881	0.00165187	0.0240171	dre_miR_145_st	2	157346142
GUCCAGUUUUCCCAGGAAUCCCU	BUN	0.216908	0.00164961	0.0240002	bta_miR_145_st;cfa_miR_145_st;eca_miR_145_st;hsa_miR_145_st;mdo_miR_145_st;mmu_miR_145_st;pma_miR_145_st;rno_miR_145_st	2	157346142
AACUGGCCUACAAAGUCCCAG	BUN	0.225535	0.00105508	0.0178544	mdo_miR_193_st	12	45165048
GUCCAGUUUUCCCAGGAAUCCCUU	BUN	0.227755	0.00093787	0.0164628	ggo_miR_145_st;mml_miR_145_st;mne_miR_145_st;ppy_miR_145_st;ptr_miR_145_st;ssc_miR_145_st;xtr_miR_145_st	2	157346142	ssc-miR-145-5p	MIMAT0002123
AACUGGCCUACAAAGUCCCAGU	BUN	0.275027	5.81e-05	0.00241315	bta_miR_193a_3p_st;dre_miR_193a_st;eca_miR_193a_3p_st;fru_miR_193_st;gga_miR_193a_st;hsa_miR_193a_3p_st;mml_miR_193a_3p_st;mmu_miR_193_st;ppy_miR_193a_3p_st;ptr_miR_193a_st;rno_miR_193_st;ssc_miR_193a_3p_st;tni_miR_193_st	12	45165047	ssc-miR-193a-3p	MIMAT0013895
ACUGGCCUACAAAGUCCCAGUU	BUN	0.303581	8.28938e-06	0.00056002	tgu_miR_193b_st	12	45165046
UGGGUCUUUGCGGGCAAGAUGA	CREA	-0.284363	3.14523e-05	0.00152652	mmu_miR_193_star_st;rno_miR_193_star_st	12	45165081
UGGGUCUUUGCGGGCGAGAUGA	CREA	-0.269805	8.11168e-05	0.00306926	bta_miR_193a_5p_st;cfa_miR_193a_st;eca_miR_193a_5p_st;hsa_miR_193a_5p_st;mml_miR_193a_5p_st;ppy_miR_193a_5p_st;ssc_miR_193a_5p_st;tgu_miR_193b_star_st	12	45165081	ssc-miR-193a-5p	MIMAT0013894
UAUUGCACUUGUCCCGGCCUUU	CREA	-0.232276	0.00073539	0.0139974	bfl_miR_92a_st	11	66610809
UCCCUGAGACCCUAACUUGUGA	CREA	-0.230769	0.0007979	0.0148451	aae_miR_125_st;aae_miR_125_star_st;aga_miR_125_st;age_miR_125b_st;bfl_miR_125a_st;bta_miR_125b_st;cfa_miR_125b_st;cqu_miR_125_st;cte_miR_125_st;dan_miR_125_st;der_miR_125_st;dgr_miR_125_st;dme_miR_125_5p_st;dmo_miR_125_st;dpe_miR_125_st;dps_miR_125_st;dre_miR_125b_st;dse_miR_125_st;dsi_miR_125_st;dvi_miR_125_st;dwi_miR_125_st;dya_miR_125_st;eca_miR_125b_5p_st;fru_miR_125b_st;gga_miR_125b_st;ggo_m…	9	54334958	ssc-miR-125b	MIMAT0002120
UAUUGCACUUGUCCCGGCCUA	CREA	-0.222433	0.00124141	0.019849	aae_miR_92a_st	11	66610809
GGGAGCCUCGGUUGGCCUC	CREA	-0.220538	0.00136964	0.021337	bta_miR_2904_st	6	866777
CGGGACCGGGGUCCGGUGCG	CREA	-0.218185	0.00154566	0.0229939	bta_miR_2887_st	2	745919
UAUUGCACUUGUCCCGGCCUU	CREA	-0.214343	0.001878	0.026171	cin_miR_92b_st	X	126199521
AUUGCACUUGUCCCGGCCUAU	CREA	-0.212563	0.00205295	0.0276897	ame_miR_92a_st;ngi_miR_92a_st;nlo_miR_92a_st;nvi_miR_92a_st	11	66610810
AUUGCACUUGUCCCGGCCUG	CREA	-0.211605	0.0021532	0.0283839	tca_miR_92b_3p_st	11	66610810
UAUUGCACUUGUCCCGGCCUAU	CREA	-0.210501	0.00227427	0.0293188	aga_miR_92a_st	X	126199520
UAUUGCACUUGUCCCGGCCUG	CREA	-0.206426	0.00277648	0.0331647	gga_miR_92_st;mdo_miR_92_st;mmu_miR_92a_st;rno_miR_92a_st;xla_miR_92a_st;xtr_miR_92a_st	11	66610809
AUUGCACUUGUCCCGGCCU	CREA	-0.203782	0.00315401	0.0361334	cqu_miR_92_st	11	66610810
AUUGCACUUGUCCCGGCCUGCU	CREA	-0.201312	0.00354801	0.0390165	cte_miR_92c_st	11	66610810
UAUUGCACUUGUCCCGGCCUGC	CREA	-0.198257	0.00409657	0.0429145	sko_miR_92b_st;spu_miR_92b_st	11	66610809
UAUUGCACUCGUCCCGGCCUGU	CREA	-0.196399	0.00446657	0.0452005	sko_miR_92c_st	11	66610809
GGGGCGCGGCCGGAUCG	CREA	-0.194444	0.00488804	0.0478936	hsa_miR_3178_st	1	121361617
UAUUGCACUUGUCCCGGCCUGU	CREA	-0.193477	0.00510946	0.0492258	age_miR_92_st;bta_miR_92_st;bta_miR_92a_st;cfa_miR_92a_st;dre_miR_92a_st;eca_miR_92a_st;fru_miR_92_st;ggo_miR_92_st;hsa_miR_92a_st;lca_miR_92_st;lla_miR_92_st;mml_miR_92a_st;mne_miR_92_st;oan_miR_92a_st;ppa_miR_92_st;ppy_miR_92_st;ptr_miR_92_st;sla_miR_92_st;ssc_miR_92a_st;tgu_miR_92_st;tni_miR_92_st	X	126199520	ssc-miR-92a	MIMAT0013908
CCCCUGAGACCCUAACUUGUGA	CREA	-0.19332	0.00514614	0.0494021	ame_miR_125_st	9	54334958
UCCCACCGCUGCCACCC	CREA	0.195257	0.00470862	0.0468092	hsa_miR_1280_st;ppy_miR_1280_st;ptr_miR_1280_st	5	69630803
AAAAGUGCUUACAGUGCAGGU	CREA	0.19841	0.0040674	0.0427008	oan_miR_106_st	X	126200231
GGCGACCCAUACUUGGUUUCAGU	CREA	0.200722	0.00364859	0.039763	rno_miR_551b_st	13	115916001
AGCUGGUGUUGUGAAUCAGGCC	CREA	0.200741	0.00364515	0.0397552	dre_miR_138_st;fru_miR_138_st;tni_miR_138_st	NW_003539115.1	3128
GGAUCCGAGUCACGGCACCA	CREA	0.201281	0.00355332	0.0390455	hsa_miR_4454_st	1	269351357
CUCCUGGCUGGCUCGCCA	CREA	0.202056	0.00342492	0.0381032	oan_miR_1386_st	3	18088260
CAGUGCAAUGUUAAAAGGGCAU	CREA	0.202355	0.00337654	0.0376799	bta_miR_130a_st;cfa_miR_130a_st;dre_miR_130a_st;eca_miR_130a_st;gga_miR_130c_st;hsa_miR_130a_st;mmu_miR_130a_st;oan_miR_130b_st;ppy_miR_130a_st;ptr_miR_130a_st;rno_miR_130a_st;ssc_miR_130a_st;tgu_miR_130c_st;xtr_miR_130a_st	2	12929892	ssc-miR-130a	MIMAT0007758
UGGCAGUGUCUUAGCUGGUUGU	CREA	0.212001	0.00211132	0.0280735	age_miR_34a_st;bta_miR_34a_st;cfa_miR_34a_st;dre_miR_34_st;eca_miR_34_st;ggo_miR_34a_st;hsa_miR_34a_st;lla_miR_34a_st;mml_miR_34a_st;mmu_miR_34a_st;mne_miR_34a_st;ppa_miR_34a_st;ppy_miR_34a_st;ptr_miR_34a_st;rno_miR_34a_st;sla_miR_34a_st;ssc_miR_34a_st;tgu_miR_34a_st	NA	NA	ssc-miR-34a	MIMAT0007757
UGGCAGUGUCUUAGCUGGUUGUU	CREA	0.212065	0.00210461	0.0280218	gga_miR_34a_st;mdo_miR_34a_st;xtr_miR_34a_st	NA	NA	ssc-miR-34a	MIMAT0007757
CAGUGGUUUUACCCUAUGGUAG	CREA	0.21248	0.00206152	0.0277348	dre_miR_140_st;eca_miR_140_5p_st;fru_miR_140_st;hsa_miR_140_5p_st;mdo_miR_140_st;mml_miR_140_5p_st;mmu_miR_140_st;pma_miR_140_st;ppy_miR_140_5p_st;rno_miR_140_st;tgu_miR_140_st;tni_miR_140_st	NW_003537617.1	107293
GUUCAUGUCCCUGUUCAGGCGCCA	CREA	0.212568	0.00205247	0.0276897	mmu_miR_5097_st	4	123720251
CAGUGCAAUGUUAAAAGGGC	CREA	0.214315	0.00188059	0.0261841	ggo_miR_130a_st;mml_miR_130a_st;mne_miR_130a_st;ppa_miR_130a_st	2	12929894
UAACACUGUCUGGUAAAGAUGG	CREA	0.214891	0.00182688	0.0256666	bta_miR_141_st;eca_miR_141_st;hsa_miR_141_st;mmu_miR_141_st;ptr_miR_141_st;rno_miR_141_st	5	66193719
AACACUGUCUGGUAAAGAUGG	CREA	0.216888	0.00165131	0.024017	ggo_miR_141_st	5	66193719
AAAAGUGCUUACAGUGCAGGUA	CREA	0.22818	0.00091687	0.0162177	bta_miR_106_st;gga_miR_106_st	X	126200230
GUAUCCCACUUCUGACACCA	CREA	0.229191	0.00086862	0.0156051	bta_miR_2478_st	2	82929628
AUCGGGAAUAUCGUGUCCGCC	CREA	0.256588	0.00018322	0.00542694	rno_miR_425_star_st	13	34898118
AUCCCACCACUGCCACCAU	CREA	0.262538	0.00012764	0.00423963	hsa_miR_1260b_st	14	12588283
UGAGGUAGUAGGUUGUAUGGUU	GLU	-0.283929	4.03981e-05	0.00184224	bta_let_7c_st;cfa_let_7c_st;dre_let_7c_st;eca_let_7c_st;gga_let_7c_st;hsa_let_7c_st;mml_let_7c_st;mmu_let_7c_st;ppy_let_7c_st;ptr_let_7c_st;rno_let_7c_st;ssc_let_7c_st;tgu_let_7c_st;xtr_let_7c_st	13	191559351	ssc-let-7c	MIMAT0002151
GUGAGGACUCGGGAGGUGGAG	GLU	-0.280878	4.924e-05	0.00214069	bta_miR_1224_st	13	131580821
AGAGGUAGUAGGUUGCAUAGU	GLU	-0.271419	8.96435e-05	0.00330338	mdo_let_7d_st	3	44867277
GGGGCGCGGCCGGAUCG	GLU	-0.260154	0.00017791	0.00532358	hsa_miR_3178_st	1	121361617
AGGUAGUAGGUGUGUGGUUU	GLU	-0.259204	0.00018823	0.0055209	bta_miR_2288_st	13	5955473
AGAGGUAGUAGGUUGCAUAGUU	GLU	-0.246416	0.00039409	0.00914768	bta_let_7d_st;eca_let_7d_st;hsa_let_7d_st;mml_let_7d_st;mmu_let_7d_st;oan_let_7d_st;ppy_let_7d_st;ptr_let_7d_st;rno_let_7d_st;tgu_let_7d_st	3	44867277	ssc-let-7d-5p	MIMAT0025356
UGAGGUAGUAGGUUGUGUGGUU	GLU	-0.244446	0.00044011	0.00985531	bta_let_7b_st;cfa_let_7b_st;dre_let_7b_st;fru_let_7b_st;gga_let_7b_st;hsa_let_7b_st;mdo_let_7b_st;mml_let_7b_st;mmu_let_7b_st;oan_let_7b_st;ppy_let_7b_st;ptr_let_7b_st;rno_let_7b_st;tgu_let_7b_st;tni_let_7b_st	13	191559351
UGAGGUAGUAGGUUGUAUAGUU	GLU	-0.232229	0.00085603	0.0154728	bfl_let_7a_st;bma_let_7_st;bta_let_7a_st;cbr_let_7_st;cel_let_7_st;cfa_let_7a_st;crm_let_7_st;dre_let_7a_st;eca_let_7a_st;fru_let_7a_st;gga_let_7a_st;gga_let_7j_st;hsa_let_7a_st;lgi_let_7_st;mdo_let_7a_st;mml_let_7a_st;mmu_let_7a_st;pma_let_7a_st;ppc_let_7_st;ppy_let_7a_st;ptr_let_7a_st;rno_let_7a_st;sko_let_7_st;ssc_let_7a_st;tgu_let_7a_st;tni_let_7a_st;xtr_let_7a_st	9	54378110	ssc-let-7a	MIMAT0013865
UGAGGUAGUAGGUUGUAUAGU	GLU	-0.229446	0.00099138	0.0170869	ame_let_7_st;bmo_let_7_st;cte_let_7_st;dan_let_7_st;der_let_7_st;dgr_let_7_st;dme_let_7_5p_st;dmo_let_7_st;dpe_let_7_st;dps_let_7_st;dse_let_7_st;dsi_let_7_st;dvi_let_7_st;dwi_let_7_st;dya_let_7_st;isc_let_7_st;ngi_let_7_st;nvi_let_7_st	3	44864443
UGAGGUAGUAGAUUGUAUGGUU	GLU	-0.225054	0.00124554	0.0198876	pma_let_7c_st	3	44864810
UGAGGUAGUUGGUUGUAUGGUU	GLU	-0.22082	0.00154578	0.0229939	dre_let_7d_st;fru_let_7d_st;tni_let_7d_st	13	191559351
UUCAAGUAAUCCAGGAUAGGCU	GLU	-0.219754	0.00163118	0.023851	bta_miR_26a_st;cfa_miR_26a_st;dre_miR_26a_st;eca_miR_26a_st;fru_miR_26_st;ggo_miR_26a_st;hsa_miR_26a_st;lla_miR_26a_st;mml_miR_26a_st;mmu_miR_26a_st;mne_miR_26a_st;oan_miR_26_st;pma_miR_26a_st;ppa_miR_26a_st;ppy_miR_26a_st;ptr_miR_26a_st;rno_miR_26a_st;ssc_miR_26a_st;tgu_miR_26_st;tni_miR_26_st	NW_003540770.1	40653	ssc-miR-26a	MIMAT0002135
UAGCAGCACAUCAUGGUUUGU	GLU	-0.218824	0.00170911	0.0245477	oan_miR_15c_st;tgu_miR_15c_st	NW_003613303.1	70425
GUGAGGACUGGGGAGGUGGAG	GLU	-0.215422	0.00202417	0.0274347	mmu_miR_1224_st;rno_miR_1224_st	13	131580821
UUCAAGUAAUCCAGGAUAGGC	GLU	-0.21481	0.0020862	0.0279252	gga_miR_26a_st;mdo_miR_26_st;xtr_miR_26_st	NW_003540770.1	40653
UGAGGUAGUAGGUUGUAUAG	GLU	-0.213711	0.0022019	0.0287541	tca_let_7_5p_st	9	54378112
UGAGGUAGUAGGUUGUAAAGUU	GLU	-0.209257	0.00273288	0.032814	pma_let_7d_st	9	54378110
UGAGGUAGUAGGUUAUGUUGUU	GLU	-0.205892	0.0032083	0.0365383	cin_let_7b_st;csa_let_7b_st	14	101757941
CGCGGGUCGGGGUCUGCAGG	GLU	-0.20414	0.00348452	0.0384924	hsa_miR_3621_st	8	1462207
UGAGGUAGUAGUUUGUAUAGUU	GLU	-0.202466	0.00376821	0.0405817	dre_let_7g_st;fru_let_7g_st;tni_let_7g_st	9	54378110
UGAGGUAGUAGGUUGUUUAGUU	GLU	-0.20019	0.00418717	0.0434786	xtr_let_7e_st	3	44864443
AGGGACGGGACGCGGUGCAGUGUU	GLU	-0.196644	0.00492408	0.048087	rno_miR_92b_star_st;ssc_miR_92b_5p_st	4	103407149	ssc-miR-92b-5p	MIMAT0017377
ACUGGCCUACAAAGUCCCAGUU	GLU	0.195877	0.00509824	0.0491634	tgu_miR_193b_st	12	45165046
ACUGUGCGUGUGACAGCGGCU	GLU	0.197901	0.00465063	0.0464723	mdo_miR_210_st	2	339120
UGUAAACAUCCACGACUGGAAGCU	GLU	0.201798	0.0038871	0.0414565	pma_miR_30d_st	NW_003540052.2	200566
UGAGAUGAAGCACUGUAGCUC	GLU	0.202664	0.00373352	0.040333	cfa_miR_143_st;dre_miR_143_st;eca_miR_143_st;hsa_miR_143_st;mml_miR_143_st;mmu_miR_143_st;oan_miR_143_st;ssc_miR_143_3p_st	2	157344786	ssc-miR-143-3p	MIMAT0013879
UCCAGUGCCCUCCUCUCC	GLU	0.203096	0.00365894	0.0398198	hsa_miR_1825_st;ptr_miR_1825_st	4	6453006
CAGUGGUUUUACCCUAUGGUAG	GLU	0.203695	0.00355788	0.0390858	dre_miR_140_st;eca_miR_140_5p_st;fru_miR_140_st;hsa_miR_140_5p_st;mdo_miR_140_st;mml_miR_140_5p_st;mmu_miR_140_st;pma_miR_140_st;ppy_miR_140_5p_st;rno_miR_140_st;tgu_miR_140_st;tni_miR_140_st	NW_003537617.1	107293
AACUGGCCUACAAAGUCCCAGU	GLU	0.205163	0.00332079	0.0373145	bta_miR_193a_3p_st;dre_miR_193a_st;eca_miR_193a_3p_st;fru_miR_193_st;gga_miR_193a_st;hsa_miR_193a_3p_st;mml_miR_193a_3p_st;mmu_miR_193_st;ppy_miR_193a_3p_st;ptr_miR_193a_st;rno_miR_193_st;ssc_miR_193a_3p_st;tni_miR_193_st	12	45165047	ssc-miR-193a-3p	MIMAT0013895
UGUAAACAUCCUACACUCAGC	GLU	0.205328	0.00329508	0.0371495	age_miR_30b_st;ggo_miR_30b_st;lla_miR_30b_st;mml_miR_30b_st;mne_miR_30b_st;ppa_miR_30b_st;ptr_miR_30b_st	NW_003540667.2	156311
AUAUAAUCGGCAUAUAACC	GLU	0.206603	0.00310206	0.0356623	tca_miR_3902_3p_st	1	275344345
UGUAAACAUCCUCGACUGAAAGCU	GLU	0.207352	0.00299351	0.034839	pma_miR_30c_st	1	57750799
UGUAAACAUCCUCGACUGGAAGC	GLU	0.21047	0.00257787	0.0315941	cfa_miR_30a_st;oan_miR_30a_st;pma_miR_30a_st;tgu_miR_30b_5p_st	NW_003540052.2	200566
UGUAAACAUCCUCGACUGGAAGCU	GLU	0.211341	0.00247151	0.0308445	bta_miR_30a_5p_st	NW_003540052.2	200566
CGCAUCCCCUAGGGCAUUGGUGU	GLU	0.214044	0.00216623	0.0284443	bta_miR_324_st;cfa_miR_324_st;eca_miR_324_5p_st;hsa_miR_324_5p_st;mml_miR_324_5p_st;mmu_miR_324_5p_st;ppy_miR_324_5p_st;rno_miR_324_5p_st;ssc_miR_324_st	3	139855174	ssc-miR-324	MIMAT0013957
ACCCCACUCCUGGUACC	GLU	0.21522	0.00204443	0.0276152	hsa_miR_4286_st	17	39416527
UUGUGCGUGUGACAGCGGCU	GLU	0.216932	0.00187833	0.026171	bmo_miR_210_st	2	339121
UGUAAACAUCCUUGACUGGAAGC	GLU	0.220766	0.00154999	0.0230097	oan_miR_30e_st	6	157476704
CAGUGCAAUAUUAAAAGGGCAU	GLU	0.222205	0.00144097	0.0220912	dre_miR_130c_st;fru_miR_130_st;gga_miR_130a_st;tgu_miR_130a_st;tni_miR_130_st;xtr_miR_130c_st	2	12929892
UGUAAACAUCCUACACUCAGCU	GLU	0.222933	0.00138851	0.0215631	bta_miR_30b_5p_st;cfa_miR_30b_st;dre_miR_30b_st;eca_miR_30b_st;fru_miR_30b_st;gga_miR_30b_st;hsa_miR_30b_st;mmu_miR_30b_st;oan_miR_30b_st;ppy_miR_30b_st;rno_miR_30b_5p_st;ssc_miR_30b_5p_st;tni_miR_30b_st;xtr_miR_30b_st	4	6717653	ssc-miR-30b-5p	MIMAT0007756
UGUAAACAUCCUUGACUGGAAGCU	GLU	0.224649	0.00127176	0.0201941	bta_miR_30e_5p_st;ssc_miR_30e_5p_st;tgu_miR_30a_5p_st	6	157476703	ssc-miR-30e-5p	MIMAT0013872
ACUAUAUAUCAAGCAUAUUCCU	GLU	0.227125	0.00111905	0.0185628	mmu_miR_190_star_st;rno_miR_190_star_st	1	120448026
UGUAAACAUCCCUGACUGGAAGCU	GLU	0.234967	0.0007396	0.014053	pma_miR_30b_st	NW_003540667.2	160436
CAGUGCAAUAAUGAAAGGGCAU	GLU	0.236618	0.00067666	0.013254	dre_miR_130b_st	14	53695571
CAGUGCAAUGUUAAAAGGGCAU	GLU	0.240223	0.00055601	0.011681	bta_miR_130a_st;cfa_miR_130a_st;dre_miR_130a_st;eca_miR_130a_st;gga_miR_130c_st;hsa_miR_130a_st;mmu_miR_130a_st;oan_miR_130b_st;ppy_miR_130a_st;ptr_miR_130a_st;rno_miR_130a_st;ssc_miR_130a_st;tgu_miR_130c_st;xtr_miR_130a_st	2	12929892	ssc-miR-130a	MIMAT0007758
GGAGGGAGGAAAAAAAAAAA	GLU	0.241806	0.00050961	0.0109521	gga_miR_1599_st	12	24894245
UCGCCUCCUCCUCUCCC	GLU	0.242306	0.00049572	0.010754	bta_miR_1281_st;hsa_miR_1281_st;ppy_miR_1281_st;ptr_miR_1281_st	X	2264282
AAGGCAGGGCCCCCGCUCCCC	GLU	0.242337	0.00049487	0.0107408	hsa_miR_940_st;mml_miR_940_st;ptr_miR_940_st	3	42431003
UGUGCAAAUCCAUGCAAAACUG	GLU	0.247476	0.00037121	0.00879847	cfa_miR_19b_st	11	66610693
UAGCACCAUUUGAAAUCAGUGU	GLU	0.248606	0.00034817	0.00840721	dre_miR_29b_st;fru_miR_29b_st;oan_miR_29b_st;pma_miR_29c_st;sko_miR_29b_st;tni_miR_29b_st	18	19034872
UGUGCAAACCCAUGCAAAACUGA	GLU	0.252074	0.00028553	0.00734508	dre_miR_19d_st	X	126199657
UCCCACCGCUGCCACCC	GLU	0.25223	0.00028298	0.00733462	hsa_miR_1280_st;ppy_miR_1280_st;ptr_miR_1280_st	5	69630803
CUGCCAAUUCCAUAGGUCACAG	GLU	0.252873	0.00027266	0.00715193	hsa_miR_192_star_st;mmu_miR_192_star_st;oan_miR_192_star_st	2	6417033
UGUGCAAAUCCAUGCAAAACUGA	GLU	0.255676	0.00023167	0.00639486	age_miR_19b_st;bta_miR_19b_st;dre_miR_19b_st;eca_miR_19b_st;fru_miR_19b_st;gga_miR_19b_st;ggo_miR_19b_st;hsa_miR_19b_st;lca_miR_19b_st;lla_miR_19b_st;mdo_miR_19b_st;mml_miR_19b_st;mmu_miR_19b_st;mne_miR_19b_st;oan_miR_19b_st;pma_miR_19b_st;ppa_miR_19b_st;ppy_miR_19b_st;ptr_miR_19b_st;rno_miR_19b_st;sla_miR_19b_st;ssc_miR_19b_st;tgu_miR_19b_st;tni_miR_19b_st;xla_miR_19b_st;xtr_miR_19b_st	X	126199657	ssc-miR-19b	MIMAT0013950
UAGCACCAUUUGAAAUCAGUGUU	GLU	0.262888	0.00015106	0.00475779	bta_miR_29b_st;cfa_miR_29b_st;eca_miR_29b_st;gga_miR_29b_st;hsa_miR_29b_st;mml_miR_29b_st;mmu_miR_29b_st;rno_miR_29b_st;xtr_miR_29b_st	18	19034872	ssc-miR-29b	MIMAT0002137
AGGCCGAAGUGGAGAAGGGUU	GLU	0.296565	1.73627e-05	0.00098205	mdo_miR_739_st	6	868795
GUGACAUCACAUAUACGGCGGC	GLU	0.333651	1.14715e-06	0.00012462	cfa_miR_489_st;eca_miR_489_st	9	80161833
UGGCAGUGUCUUAGCUGGUUGU	IP	-0.355945	1.31741e-07	2.598e-05	age_miR_34a_st;bta_miR_34a_st;cfa_miR_34a_st;dre_miR_34_st;eca_miR_34_st;ggo_miR_34a_st;hsa_miR_34a_st;lla_miR_34a_st;mml_miR_34a_st;mmu_miR_34a_st;mne_miR_34a_st;ppa_miR_34a_st;ppy_miR_34a_st;ptr_miR_34a_st;rno_miR_34a_st;sla_miR_34a_st;ssc_miR_34a_st;tgu_miR_34a_st	NA	NA	ssc-miR-34a	MIMAT0007757
UGGCAGUGUCUUAGCUGGUUGUU	IP	-0.349648	2.25932e-07	3.73239e-05	gga_miR_34a_st;mdo_miR_34a_st;xtr_miR_34a_st	NA	NA	ssc-miR-34a	MIMAT0007757
AGGCCGAAGUGGAGAAGGGUU	IP	-0.256719	0.00018179	0.00539176	mdo_miR_739_st	6	868795
UGUAACAGCGACUCCAUGUGGA	IP	-0.255534	0.00019517	0.00566578	ssc_miR_194_5p_st	10	11962873	ssc-miR-194b-5p	MIMAT0020365
UCAGUGCAUGACAGAACUUGA	IP	-0.251849	0.00024288	0.00660078	pma_miR_152a_st	12	24289551
UAGCAGCACGUAAAUAUUGGUG	IP	-0.251299	0.00025086	0.00676246	bta_miR_16a_st;dre_miR_16a_st;gga_miR_16_st;lca_miR_16_st;oan_miR_16b_st;tgu_miR_16a_st;xtr_miR_16a_st	13	108388297
CAAAGUGCUCAUAGUGCAGGUAG	IP	-0.242094	0.00042662	0.00963708	eca_miR_20b_st;gga_miR_20b_st;hsa_miR_20b_st;mml_miR_20b_st;mmu_miR_20b_st;oan_miR_20b_st;ppy_miR_20b_st;ptr_miR_20b_st;rno_miR_20b_5p_st;tgu_miR_20b_st;xla_miR_20_st;xtr_miR_20b_st	X	126199822
UCAGUGCAUGACAGAACUUUGG	IP	-0.236315	0.00058939	0.0121642	dre_miR_152_st	12	24289550
UAGCAGCACAUAAUGGUUUGUU	IP	-0.235788	0.00060681	0.0124113	mdo_miR_15a_st	NW_003613303.1	70425
UAAAGUGCUUAUAGUGCAGGUA	IP	-0.234273	0.00065948	0.0130288	age_miR_20_st;ggo_miR_20_st;lca_miR_20_st;lla_miR_20_st;mml_miR_20a_st;mne_miR_20_st;ppa_miR_20_st;ppy_miR_20_st;ptr_miR_20a_st;sla_miR_20_st;ssc_miR_20_st	11	66610520	ssc-miR-20a	MIMAT0002129
AUAUAAUCGGCAUAUAACC	IP	-0.233827	0.00067579	0.0132518	tca_miR_3902_3p_st	1	275344345
UCAGUGCAUGACAGAACUUGGG	IP	-0.23262	0.00072177	0.0138161	bta_miR_152_st;mdo_miR_152_st	12	24289550
UGGAGUGUGACAUUUGUG	IP	-0.229286	0.00086418	0.0155688	oan_miR_1352_st	13	24132907
UAGCAGCACGUAAAUAUUGGAG	IP	-0.223665	0.00116407	0.0190181	dre_miR_16b_st;fru_miR_16_st;tgu_miR_16b_st;tni_miR_16_st	NW_003613303.1	70565
UAGCAGCACAUAAUGGUUUGU	IP	-0.220996	0.00133754	0.020969	bta_miR_15a_st;cfa_miR_15a_st;gga_miR_15a_st;oan_miR_15a_st;ssc_miR_15a_st;tgu_miR_15a_st	NW_003613303.1	70425	ssc-miR-15a	MIMAT0007753
UGUAAACAUCCUUGACUGGAAG	IP	-0.217624	0.00159058	0.0234452	dre_miR_30e_st;eca_miR_30e_st;hsa_miR_30e_st;mml_miR_30e_st;mmu_miR_30e_st;ppy_miR_30e_st;ptr_miR_30e_st;rno_miR_30e_st;xtr_miR_30e_st	6	157476705
UGAGAACUGAAUUCCAUGGGUU	IP	-0.216512	0.00168306	0.0242692	cfa_miR_146a_st;eca_miR_146a_st;gga_miR_146a_st;hsa_miR_146a_st;mdo_miR_146a_st;mml_miR_146a_st;mmu_miR_146a_st;ppy_miR_146a_st;ptr_miR_146a_st;rno_miR_146a_st;tgu_miR_146c_st	16	68394566	ssc-miR-146a-5p	MIMAT0022963
UACCCAUUGCAUAUCGGAGUUG	IP	-0.215112	0.00180668	0.0255058	cfa_miR_660_st;eca_miR_660_st;hsa_miR_660_st;mml_miR_660_st;ppy_miR_660_st;ptr_miR_660_st	X	48640827
UCAGUGCAUGACAGAACUUGG	IP	-0.201363	0.00353944	0.0389615	cfa_miR_152_st;hsa_miR_152_st;mml_miR_152_st;mmu_miR_152_st;ptr_miR_152_st;rno_miR_152_st;ssc_miR_152_st	12	24289551	ssc-miR-152	MIMAT0013887
AGCUACAUUGUCUGCUGGGUUC	IP	-0.195056	0.00475242	0.0470918	pma_miR_221_st	X	45274878
UUAAUGCUAAUUGUGAUAGGGGU	IP	-0.193922	0.00500647	0.048593	mmu_miR_155_st	NW_003613383.1	133231
UCCAUUACACUACCCUGCCUCU	IP	0.193594	0.00508209	0.0491026	bta_miR_885_st;cfa_miR_885_st;eca_miR_885_5p_st;hsa_miR_885_5p_st;mml_miR_885_5p_st;ppy_miR_885_5p_st;ssc_miR_885_5p_st	NW_003613098.1	42336	ssc-miR-885-5p	MIMAT0013902
UAUUGCACUUGUCCCGGCCUGU	IP	0.194145	0.00495558	0.048296	age_miR_92_st;bta_miR_92_st;bta_miR_92a_st;cfa_miR_92a_st;dre_miR_92a_st;eca_miR_92a_st;fru_miR_92_st;ggo_miR_92_st;hsa_miR_92a_st;lca_miR_92_st;lla_miR_92_st;mml_miR_92a_st;mne_miR_92_st;oan_miR_92a_st;ppa_miR_92_st;ppy_miR_92_st;ptr_miR_92_st;sla_miR_92_st;ssc_miR_92a_st;tgu_miR_92_st;tni_miR_92_st	X	126199520	ssc-miR-92a	MIMAT0013908
AUCCCACCACUGCCACCAU	IP	0.205543	0.0028977	0.0340734	hsa_miR_1260b_st	14	12588283
UAUUGCACUCGUCCCGGCCUC	IP	0.210644	0.00225823	0.0292315	xtr_miR_92b_st	4	103407111
GUAGAGGAGAUGGCGCAGGG	IP	0.215955	0.00173133	0.0247856	bta_miR_877_st;hsa_miR_877_st;mml_miR_877_st;mmu_miR_877_st;ppy_miR_877_st;rno_miR_877_st	7	26806380
UCGAAUCCCAGCGGUGCCUCU	IP	0.219139	0.00147191	0.0223508	mmu_miR_5100_st	12	55878352
GAGGGUUGGGCGGAGGCUUUCC	IP	0.23488	0.00063787	0.0127742	bta_miR_296_st	17	66288715
GGGCUGGGCUGGGCUGGGCA	IP	0.2372	0.00056121	0.0117555	gga_miR_1587_st	15	152121446
CACGGCCGCCGCCGGGCGCC	IP	0.238789	0.00051373	0.0110138	ssc_miR_4332_st	6	870456	ssc-miR-4332	MIMAT0017962
GAGGGCGGGUGGAGGAGGA	IP	0.240936	0.00045544	0.0100905	hsa_miR_3141_st	9	53709853
CUCUAAGGGCUGGGCCGGUCGG	IP	0.241508	0.000441	0.00986007	bta_miR_2487_st	7	11396203
GGGGCUGGGCGCGCGCC	IP	0.241612	0.0004384	0.00982846	hsa_miR_4492_st	6	868261
UCUCGCUGGGGCCUCCA	IP	0.242156	0.00042513	0.0096232	hsa_miR_720_st;ptr_miR_720_st	2	16007497
UAUUGCACUCGUCCCGGCCUCC	IP	0.242709	0.00041201	0.00940902	bta_miR_92b_st;dre_miR_92b_st;mmu_miR_92b_st;rno_miR_92b_st;ssc_miR_92b_3p_st	4	103407110	ssc-miR-92b-3p	MIMAT0013909
GCCCCUGGGCCUAUCCUAGAA	IP	0.243203	0.0004006	0.00924511	bta_miR_331_st;cfa_miR_331_st;eca_miR_331_st;hsa_miR_331_3p_st;mml_miR_331_3p_st;mmu_miR_331_3p_st;ptr_miR_331_st;rno_miR_331_st;ssc_miR_331_3p_st	5	92224987	ssc-miR-331-3p	MIMAT0013930
AGGAGGGAGGGGAUGGGCCAAGUUC	IP	0.255431	0.00019637	0.00568754	mmu_miR_1249_star_st	5	1499725
AAAAGGCGGGAGAAGCCCCA	IP	0.255488	0.0001957	0.00567765	hsa_miR_4484_st	18	41221011
GUGAGGACUCGGGAGGUGGAGGGU	IP	0.263717	0.00011869	0.00401852	ptr_miR_1224_5p_st	13	131580821
GGUGGGAGGUGGGGUGGGCA	IP	0.264377	0.00011394	0.00393394	mmu_miR_705_st	6	145384549
CAACGAGGAGGCCGGGACCA	IP	0.266903	9.73627e-05	0.00349659	osa_miR1846e_st	17	46601738
CAGGAGGCAGUGGGCGAGCAGG	IP	0.26911	8.476e-05	0.00317084	hsa_miR_4695_5p_st	6	7030153
AGGAAGCCCUGGAGGGGCUGGAG	IP	0.269877	8.075e-05	0.00305802	bta_miR_671_st;eca_miR_671_5p_st;hsa_miR_671_5p_st;mml_miR_671_5p_st;mmu_miR_671_5p_st;ppy_miR_671_5p_st	18	6286740
CGGGGAGGGAGGGUGGUG	IP	0.273355	6.4702e-05	0.00259151	oan_miR_1408_st	9	71842304
GGGGCCUGGCGGCGGGCGG	IP	0.27368	6.33654e-05	0.00255481	mmu_miR_2861_st	NW_003539295.2	46470
UGCGGGGCUAGGGCUAACAGCA	IP	0.2786	4.60583e-05	0.00203877	bta_miR_744_st;hsa_miR_744_st;mmu_miR_744_st;ppy_miR_744_st;ptr_miR_744_st;ssc_miR_744_st	12	59358209	ssc-miR-744	MIMAT0015708
UUGGGCUGGGCUGGGUUGGG	IP	0.284776	3.05944e-05	0.00149985	hsa_miR_1587_st	9	46690881
AGGGCGGGCGGCGACUGGAA	IP	0.290967	2.0106e-05	0.00110439	bta_miR_2900_st	7	106069936
UUGGGGCUGGGCUGGGGGCA	IP	0.295049	1.51619e-05	0.00088364	bta_miR_1584_st	6	152494278
UGGGUGAGGAGGGCGAGG	IP	0.2961	1.409e-05	0.00083353	oan_miR_1412_st	3	16798563
UGGCUGGAGUGCGGCGGAGGU	IP	0.296131	1.406e-05	0.0008329	bta_miR_2428_st	1	186019627
CGGGACCGGGGUCCGGUGCG	IP	0.299726	1.09153e-05	0.00069095	bta_miR_2887_st	2	745919
UGUGGAGGGAGGGCUUGGGA	IP	0.30359	8.28377e-06	0.00056002	tgu_miR_2982_st	12	46864266
UUGGGGCUGGGUGGGGAGAGGG	IP	0.306914	6.51311e-06	0.0004682	bta_miR_2412_st	7	110567886
CCCCGGGGAGCCCGGCG	IP	0.308709	5.71299e-06	0.00042462	hsa_miR_4532_st	7	4478538
GGGGCCUGGCGGUGGGCGG	IP	0.316988	3.08633e-06	0.00026134	hsa_miR_2861_st	10	45386429
AUGGAUGGGGGUGAGGGGUGCA	IP	0.317301	3.01441e-06	0.00025643	bta_miR_2392_st	8	941546
GCGGGGCUGGGCGCGCG	IP	0.320661	2.3346e-06	0.00021073	hsa_miR_4508_st	16	81833047
GGGGCGCGGCCGGAUCG	IP	0.323809	1.83251e-06	0.0001729	hsa_miR_3178_st	1	121361617
GCCGGCGGGAGCCCCAGGGAG	IP	0.326844	1.44711e-06	0.00014431	mmu_miR_2137_st	1	2924027
CCGGGUGGGGCUGGGCUGGG	IP	0.328859	1.23543e-06	0.00012988	gga_miR_1584_st	NW_003539576.1	60607
GCGGGAUGGGCUGGGCCGGG	IP	0.33056	1.08e-06	0.00011971	tgu_miR_2974_st	7	33141017
UGGCAGGGAGGCAGGGAGGGG	IP	0.331754	9.82387e-07	0.00011171	ppy_miR_1207_5p_st	NW_003539009.1	15023
UGCAGGUGAUGGCGGGGCUG	IP	0.332117	9.54373e-07	0.00010897	gga_miR_1636_st	9	592436
GUGGGUGGGGGCAUCUCGGA	IP	0.334097	8.14612e-07	9.61243e-05	mml_miR_1230_st	2	141010219
CGGGGUGGGUGAGGUCGGGC	IP	0.334528	7.8689e-07	9.33563e-05	hsa_miR_4651_st	10	28838772
AGGAUGACGGUGGGGCUGGUGA	IP	0.337767	6.05683e-07	7.59758e-05	mmu_miR_1934_star_st	X	2742673
AAGGCGGCGGCGGCGGCCG	IP	0.338362	5.77056e-07	7.325e-05	tca_miR_3885_5p_st	4	129213920
CUGGGUUGGGCUGGGCUGGG	IP	0.340927	4.67798e-07	6.37983e-05	hsa_miR_4507_st	6	81647492
CGGCGCGACCGGCCCGGGG	IP	0.341151	4.59258e-07	6.283e-05	hsa_miR_4634_st	14	28290047
AGGCAGGGGCUGGGCCUGCAGC	IP	0.343205	3.87628e-07	5.52754e-05	mmu_miR_346_star_st	14	94051846
CGGGAGGGGAGGGAGGGCGGG	IP	0.349792	2.23192e-07	3.7011e-05	gga_miR_2127_st	NW_003613477.1	122032
CGGCGCAGCUGUCGGGAGGGCG	IP	0.350649	2.07529e-07	3.5138e-05	bta_miR_2436_5p_st	5	51439592
AGUGAGGAGGCCGGGGCCGCU	IP	0.351561	1.92019e-07	3.34449e-05	osa_miR1846a_5p_st;osa_miR1846b_5p_st;osa_miR1846c_5p_st	12	3767152
CUGGAGCGCGCGGGCGAGGCAGGC	IP	0.352177	1.82175e-07	3.203e-05	mmu_miR_5130_st	11	53669691
AGGCGGGCCGGGGUUGGA	IP	0.355536	1.36486e-07	2.64385e-05	bta_miR_2899_st	1	153888808
GGGGCUGGGGCCGGGGCCGAGC	IP	0.356082	1.30189e-07	2.579e-05	hsa_miR_762_st;ptr_miR_762_st	8	1092756
GUGAGGACUCGGGAGGUGGAG	IP	0.360889	8.55522e-08	1.827e-05	bta_miR_1224_st	13	131580821
GGGGGGCAGGAGGGGCUCA	IP	0.362175	7.63726e-08	1.68012e-05	rno_miR_328a_star_st	6	25134132
AGGGACGGGACGCGGUGCAGUG	IP	0.362405	7.48334e-08	1.67146e-05	hsa_miR_92b_star_st	4	103407151
GGGAGAAGGGUCGGGGC	IP	0.362886	7.17091e-08	1.63742e-05	hsa_miR_4516_st	4	2796432
AGGGGGCGGGCUCCGGCG	IP	0.363816	6.60275e-08	1.56246e-05	hsa_miR_4488_st	17	67586529
AGCAGGUGCGGGGCGGCG	IP	0.363871	6.57018e-08	1.56246e-05	hsa_miR_3665_st	3	133836025
GUGGGCGGUGCGGGGCGGCG	IP	0.363973	6.51103e-08	1.56246e-05	gga_miR_1777_st	15	157557669
GGGGGGCAGGAGGGGCUCAGGG	IP	0.365966	5.44959e-08	1.39516e-05	mmu_miR_328_star_st	6	25134129
AGGCUGGGCUGGGACGGA	IP	0.366339	5.27006e-08	1.3596e-05	hsa_miR_4505_st	12	20704700
AUUUGGGGUGGGGGAUGGGGA	IP	0.367047	4.94516e-08	1.31431e-05	eca_miR_1892_st	1	40956202
GAGGGAGGGACGGGGGCGGUGC	IP	0.368328	4.4061e-08	1.21865e-05	mmu_miR_149_star_st	15	154447033
AGGGGCGGGAGGGGUCGGGC	IP	0.36843	4.3656e-08	1.21865e-05	gga_miR_1607_st	2	339014
GCGGAGCGGAGCGGAGCGGGG	IP	0.368528	4.3273e-08	1.21865e-05	tgu_miR_2976_st	3	10645928
CGGGUGAGGGCGGUGGGGGA	IP	0.368808	4.21886e-08	1.21389e-05	gga_miR_1790_st	7	2238825
CGGGCGUGGUGGUGGGCG	IP	0.369093	4.11151e-08	1.2e-05	ppy_miR_1268_st	14	152455035
UGGCAGGGAGGCUGGGAGGGG	IP	0.3696	3.92668e-08	1.1615e-05	hsa_miR_1207_5p_st	14	35649475
UUGGGGCUGGGGAGAGGCGGG	IP	0.370906	3.48728e-08	1.0977e-05	bta_miR_2374_st	2	84019374
CGGCGGCAGCGCCGGGGCG	IP	0.37232	3.06463e-08	1.016e-05	bta_miR_2885_st	17	66350524
GGCCGGGGGACGGGCUGGGA	IP	0.372998	2.87987e-08	9.71508e-06	peu_miR2911_st	12	46773536
CCGGGCCGGGCGGGCGGG	IP	0.373381	2.78038e-08	9.5842e-06	tgu_miR_2981_st	6	74545310
UGGGGCGGAGCUUCCGGAG	IP	0.375185	2.3545e-08	8.73518e-06	hsa_miR_3180_st	8	87201639
CUCCGGGACGGCUGGGC	IP	0.376616	2.06197e-08	7.98839e-06	hsa_miR_4497_st	13	109189893
GGCGGCGGCGGAGGCGGGGG	IP	0.377387	1.91934e-08	7.73756e-06	hsa_miR_3960_st;mmu_miR_3960_st	1	302142706
CGGGGCGGCAGGGGCCUC	IP	0.380893	1.38189e-08	6.16816e-06	hsa_miR_3196_st	13	216417897
CUGCGGGGGAGGAGGGAGGGGG	IP	0.382569	1.17942e-08	5.55191e-06	gga_miR_1770_st	5	16184162
UGGGGAGCGGCCCCCGGGCGGG	IP	0.383174	1.11366e-08	5.29931e-06	bta_miR_1343_st	2	28433229
GUGGGGCCAGGCGGUGGUGG	IP	0.383667	1.06269e-08	5.29931e-06	mml_miR_1227_st	9	135420289
GGGGACAGGGAUGGGUGUGGGG	IP	0.384277	1.00274e-08	5.18504e-06	sko_miR_4825_star_st	NW_003537559.2	33825
AGAGCAGGGGCUGUGGGCUGCA	IP	0.386406	8.1797e-09	4.59091e-06	bta_miR_2442_st	6	82804454
GGGUGCGGGCCGGCGGGG	IP	0.387806	7.14823e-09	4.06409e-06	hsa_miR_4466_st	14	53692931
UGGUGGAGAUGCCGGGGA	IP	0.391167	5.15972e-09	3.42246e-06	bta_miR_2898_st	9	116610086
GUGGGUUGGGGCGGGCUCUG	IP	0.391755	4.87154e-09	3.33641e-06	hsa_miR_3940_5p_st	10	20142288
CGGGCGUGGUGGUGGGGGUG	IP	0.39338	4.15458e-09	3.03132e-06	hsa_miR_1268b_st	3	77713119
GCGGGCGGGGCCGGGGGCGGGG	IP	0.394706	3.64566e-09	2.8e-06	mmu_miR_5126_st	6	58229492
CCCCAGGGCGACGCGGCGGG	IP	0.394924	3.56829e-09	2.78951e-06	hsa_miR_1915_st;ppy_miR_1915_st	12	1413346
AAGGGGGGGGGGGGAAAGA	IP	0.397533	2.7543e-09	2.31881e-06	osa_miR2919_st	16	25789138
AGGGACGGGACGCGGUGCAGUGUU	IP	0.397736	2.69934e-09	2.31709e-06	rno_miR_92b_star_st;ssc_miR_92b_5p_st	4	103407149	ssc-miR-92b-5p	MIMAT0017377
GAGACUGGGGUGGGGCC	IP	0.406467	1.11594e-09	1.17059e-06	hsa_miR_4463_st	15	39299444
GGGUGGUGGUGGAAGUCGGGG	IP	0.406471	1.11549e-09	1.17059e-06	ame_miR_3751_st	9	72425610
CGCGCCGGGCCCGGGUU	IP	0.40682	1.07624e-09	1.17059e-06	hsa_miR_3195_st	17	41206838
CCCGGGGCGCCCGAGGGG	IP	0.40776	9.7699e-10	1.12555e-06	oan_miR_1394_st	NW_003538861.2	34944
GGGGGCGGUGGGGGGCGGGG	IP	0.407961	9.569e-10	1.12555e-06	bta_miR_1777b_st	6	827723
GGGGCGGGGGGGCGGGUG	IP	0.40899	8.6037e-10	1.07615e-06	bta_miR_2881_st	12	12717988
CGCGGGUCGGGGUCUGCAGG	IP	0.410939	7.028e-10	9.32338e-07	hsa_miR_3621_st	8	1462207
GGUGGGGUGGGGGGGUUGG	IP	0.413213	5.541e-10	8.91708e-07	bta_miR_2888_st	14	120707919
AGGGAGGGACGGGGGCUGUGC	IP	0.414359	4.9119e-10	8.91708e-07	hsa_miR_149_star_st	15	154447033
GUGGGUUGGGGGCGGGGG	IP	0.41695	3.7343e-10	7.78487e-07	oan_miR_1346_st	1	11400988
GGCGGGUGCGGGGGUGG	IP	0.418859	3.0466e-10	7.01976e-07	hsa_miR_3656_st	2	2788698
UGGGGGCGGUGGGGGGCGGG	IP	0.419415	2.8706e-10	6.98168e-07	bta_miR_1777a_st	4	41993746
ACAGGAGUGGGGGUGGGACAU	IP	0.421317	2.3401e-10	6.02628e-07	hsa_miR_4433_st	12	23528872
CGUGGUGGUGGGGGUGGGG	IP	0.425371	1.5074e-10	4.39928e-07	tca_miR_3897_3p_st	12	36204128
CGGGGGUGGCGGGGAGGGGG	IP	0.426717	1.3008e-10	4.06765e-07	bta_miR_2305_st	NW_003541294.1	709
CCCUGGAGUGACGGGGGUG	IP	0.428434	1.0769e-10	3.62657e-07	ssc_miR_4334_5p_st	15	134433015	ssc-miR-4334-5p	MIMAT0017966
CGGGCGUGGUGGUGGGGG	IP	0.432253	7.048e-11	3.08548e-07	hsa_miR_1268_st	3	77713119
GGGUCCCGGGGAGGGGGG	IP	0.439431	3.1311e-11	2.74142e-07	hsa_miR_4281_st	1	304359153
GUGGGUACGGCCCAGUGGGGGG	IP	0.453819	5.8096e-12	1.36689e-07	hsa_miR_1225_5p_st;ppy_miR_1225_5p_st	3	42283711
CCCAGUGUUUAGACUAUCUGUUC	NH3	-0.276394	5.78315e-05	0.00240889	bta_miR_199b_st;eca_miR_199b_5p_st;hsa_miR_199b_5p_st;mdo_miR_199b_st	1	302681870
UGCCUGUCUACACUUGCUGUGC	NH3	-0.269489	8.96317e-05	0.00330338	hsa_miR_214_star_st;mmu_miR_214_star_st	9	126099520
UAUGUGCCUUUGGACUACAUCG	NH3	-0.259774	0.00016278	0.00501157	cfa_miR_455_st;hsa_miR_455_5p_st;mml_miR_455_5p_st;mmu_miR_455_star_st;ppy_miR_455_5p_st;rno_miR_455_st	1	286017390	ssc-miR-455-5p	MIMAT0022957
ACUGCAGUGAAGGCACUUGU	NH3	-0.224637	0.00116993	0.0190824	age_miR_17_3p_st;bta_miR_17_3p_st;gga_miR_17_3p_st;ggo_miR_17_3p_st;lca_miR_17_3p_st;lla_miR_17_3p_st;mml_miR_17_3p_st;mne_miR_17_3p_st;oan_miR_17_star_st;ppa_miR_17_3p_st;ppy_miR_17_3p_st;ptr_miR_17_3p_st;sla_miR_17_3p_st;xtr_miR_17_3p_st	11	66610107
ACUGCAGUGAAGGCACUUGUA	NH3	-0.220633	0.00143866	0.0220777	mdo_miR_17_3p_st	11	66610107
AGCUGGUGUUGUGAAUCAGGCC	NH3	-0.217335	0.00170132	0.0244679	dre_miR_138_st;fru_miR_138_st;tni_miR_138_st	NW_003539115.1	3128
CAGCAGCACACUGUGGUUUGUA	NH3	-0.215709	0.00184624	0.0258479	bta_miR_497_st;mmu_miR_497_st;ptr_miR_497_st;rno_miR_497_st	12	54717032
UGAGGUAGUAGUUUGUGCU	NH3	-0.215243	0.00188982	0.026278	ssc_let_7i_st	5	30021229	ssc-let-7i	MIMAT0002153
CAGCAGCACACUGUGGUUUGU	NH3	-0.21367	0.00204392	0.0276152	cfa_miR_497_st;eca_miR_497_st;hsa_miR_497_st;mdo_miR_497_st;mml_miR_497_st;ppy_miR_497_st;ssc_miR_497_st	12	54717032	ssc-miR-497	MIMAT0013926
UGGCAGUGUCUUAGCUGGUUGUU	NH3	-0.213359	0.00207576	0.0278491	gga_miR_34a_st;mdo_miR_34a_st;xtr_miR_34a_st	NA	NA	ssc-miR-34a	MIMAT0007757
UGGCAGUGUCUUAGCUGGUUGU	NH3	-0.212647	0.00215021	0.028354	age_miR_34a_st;bta_miR_34a_st;cfa_miR_34a_st;dre_miR_34_st;eca_miR_34_st;ggo_miR_34a_st;hsa_miR_34a_st;lla_miR_34a_st;mml_miR_34a_st;mmu_miR_34a_st;mne_miR_34a_st;ppa_miR_34a_st;ppy_miR_34a_st;ptr_miR_34a_st;rno_miR_34a_st;sla_miR_34a_st;ssc_miR_34a_st;tgu_miR_34a_st	NA	NA	ssc-miR-34a	MIMAT0007757
CAGUGCAAUGUUAAAAGGGC	NH3	-0.210407	0.00240063	0.0303626	ggo_miR_130a_st;mml_miR_130a_st;mne_miR_130a_st;ppa_miR_130a_st	2	12929894
UAAGGUGCAUCUAGUGCAGUUA	NH3	-0.210072	0.00244035	0.0306817	bta_miR_18b_st;cfa_miR_18b_st;gga_miR_18b_st;tgu_miR_18b_st	X	126200070
UAAUACUGCCUGGUAAUGAUGAC	NH3	-0.207585	0.00275379	0.0329841	rno_miR_200b_st	6	58064346
AAUCCUUGGAACCUAGGUGUGAGUG	NH3	-0.204765	0.00315321	0.0361334	ssc_miR_362_st	X	48638476	ssc-miR-362	MIMAT0017958
AAUUGCACGGUAUCCAUCUGUAA	NH3	-0.204291	0.0032252	0.0366857	cfa_miR_363_st;ssc_miR_363_st	X	126199353	ssc-miR-363	MIMAT0015711
UAGCAGCACGUAAAUAUUGGUG	NH3	-0.202	0.00359493	0.0394038	bta_miR_16a_st;dre_miR_16a_st;gga_miR_16_st;lca_miR_16_st;oan_miR_16b_st;tgu_miR_16a_st;xtr_miR_16a_st	13	108388297
AACAUUCAUUGUUGUCGGUGGGUU	NH3	-0.200222	0.00390776	0.0416137	ssc_miR_181d_5p_st	2	65553535	ssc-miR-181d-5p	MIMAT0013888
AGCUACAUUGUCUGCUGGGUUC	NH3	-0.198754	0.00418417	0.0434626	pma_miR_221_st	X	45274878
AGUUCUUCAGUGGCAAGCUUUA	NH3	-0.198269	0.00427947	0.0440149	bta_miR_22_5p_st;gga_miR_22_star_st;hsa_miR_22_star_st;mmu_miR_22_star_st;oan_miR_22_star_st;rno_miR_22_star_st;ssc_miR_22_5p_st	NA	NA	ssc-miR-22-5p	MIMAT0015709
UAGCAGCACGUAAAUAUUGGAG	NH3	-0.196726	0.00459525	0.0460661	dre_miR_16b_st;fru_miR_16_st;tgu_miR_16b_st;tni_miR_16_st	NW_003613303.1	70565
AGCACCAUUUGAAAUCAGUGCUU	NH3	-0.195415	0.00487993	0.0478355	bfl_miR_29b_st	9	148552490
AACAUUCAACCUGUCGGUGAGUUU	NH3	-0.194898	0.00499654	0.0485546	bta_miR_181c_st	2	65553713
CCCAGUGUUCUGACUACCUGUUC	NH3	-0.194164	0.00516609	0.0495099	pma_miR_199b_st	2	69991827
UGGCAGGGAGGCAGGGAGGGG	NH3	0.19765	0.00440377	0.0448341	ppy_miR_1207_5p_st	NW_003539009.1	15023
UUGGGGCUGGGGAGAGGCGGG	NH3	0.205733	0.00301062	0.0349414	bta_miR_2374_st	2	84019374
GUGAGGACUCGGGAGGUGGAGGGU	NH3	0.206859	0.00285207	0.0336956	ptr_miR_1224_5p_st	13	131580821
CGUGGUGGUGGGGGUGGGG	NH3	0.210159	0.00243001	0.030622	tca_miR_3897_3p_st	12	36204128
GAGGGAGGGACGGGGGCGGUGC	NH3	0.210586	0.00237973	0.0301883	mmu_miR_149_star_st	15	154447033
GGCGCCGCUCGUGGGGGGCC	NH3	0.213401	0.00207143	0.0278169	mmu_miR_5105_st	6	870934
CCCAGCAGGACGGGAGCG	NH3	0.217	0.00173031	0.024779	hsa_miR_4530_st	2	508551
UUGGGGCUGGGUGGGGAGAGGG	NH3	0.22323	0.00125859	0.0200578	bta_miR_2412_st	7	110567886
UGGCUGGAGUGCGGCGGAGGU	NH3	0.225221	0.00113483	0.0187333	bta_miR_2428_st	1	186019627
CGGGAGGGGAGGGAGGGCGGG	NH3	0.234332	0.00069853	0.0135072	gga_miR_2127_st	NW_003613477.1	122032
UCAGUGCAUGACAGAACUUGA	TCHO	-0.251	0.00026433	0.00701325	pma_miR_152a_st	12	24289551
UCAGUGCAUGACAGAACUUUGG	TCHO	-0.242585	0.00042861	0.00966214	dre_miR_152_st	12	24289550
UCAGUGCAUGACAGAACUUGGG	TCHO	-0.218688	0.00154695	0.0230035	bta_miR_152_st;mdo_miR_152_st	12	24289550
UGAGGUAGUAGUUUGUGCUGUU	TCHO	-0.21826	0.00158104	0.0233282	bta_let_7i_st;dre_let_7i_st;fru_let_7i_st;hsa_let_7i_st;mml_let_7i_st;mmu_let_7i_st;ppy_let_7i_st;ptr_let_7i_st;rno_let_7i_st;tgu_let_7i_st;tni_let_7i_st	5	30021229
CAAAGUGCUCAUAGUGCAGGUAG	TCHO	-0.217927	0.00160808	0.0236036	eca_miR_20b_st;gga_miR_20b_st;hsa_miR_20b_st;mml_miR_20b_st;mmu_miR_20b_st;oan_miR_20b_st;ppy_miR_20b_st;ptr_miR_20b_st;rno_miR_20b_5p_st;tgu_miR_20b_st;xla_miR_20_st;xtr_miR_20b_st	X	126199822
UGAGAACUGAAUUCCAUGGGUU	TCHO	-0.217245	0.00166471	0.0241077	cfa_miR_146a_st;eca_miR_146a_st;gga_miR_146a_st;hsa_miR_146a_st;mdo_miR_146a_st;mml_miR_146a_st;mmu_miR_146a_st;ppy_miR_146a_st;ptr_miR_146a_st;rno_miR_146a_st;tgu_miR_146c_st	16	68394566	ssc-miR-146a-5p	MIMAT0022963
UGAGGUAGUAGUUUGUGCUGU	TCHO	-0.213895	0.00197034	0.0269977	gga_let_7i_st;mdo_let_7i_st;xtr_let_7i_st	5	30021229
UCAGUGCAUGACAGAACUUGG	TCHO	-0.205356	0.00299384	0.034839	cfa_miR_152_st;hsa_miR_152_st;mml_miR_152_st;mmu_miR_152_st;ptr_miR_152_st;rno_miR_152_st;ssc_miR_152_st	12	24289551	ssc-miR-152	MIMAT0013887
UAAUACUGCCUGGUAAUGAUG	TCHO	-0.202469	0.00343627	0.038181	bta_miR_200b_st	6	58064346
UAGCAGCACAUAAUGGUUUGU	TCHO	-0.202387	0.00344963	0.0382517	bta_miR_15a_st;cfa_miR_15a_st;gga_miR_15a_st;oan_miR_15a_st;ssc_miR_15a_st;tgu_miR_15a_st	NW_003613303.1	70425	ssc-miR-15a	MIMAT0007753
UGGCAGUGUCUUAGCUGGUUGU	TCHO	-0.197319	0.00437454	0.0446303	age_miR_34a_st;bta_miR_34a_st;cfa_miR_34a_st;dre_miR_34_st;eca_miR_34_st;ggo_miR_34a_st;hsa_miR_34a_st;lla_miR_34a_st;mml_miR_34a_st;mmu_miR_34a_st;mne_miR_34a_st;ppa_miR_34a_st;ppy_miR_34a_st;ptr_miR_34a_st;rno_miR_34a_st;sla_miR_34a_st;ssc_miR_34a_st;tgu_miR_34a_st	NA	NA	ssc-miR-34a	MIMAT0007757
UGUAAACAUCCCCGACUGGAAGC	TCHO	0.193872	0.00512544	0.0493255	oan_miR_30d_st	NW_003540667.2	160437
GGCCGGGGGACGGGCUGGGA	TCHO	0.195047	0.0048574	0.0477408	peu_miR2911_st	12	46773536
AGGGAGGGACGGGGGCUGUGC	TCHO	0.195713	0.00471108	0.0468092	hsa_miR_149_star_st	15	154447033
ACUCGGCGUGGCGUCGGUCGUG	TCHO	0.196407	0.004563	0.0458373	ppy_miR_1307_st	NW_003540629.2	46371	ssc-miR-1307	MIMAT0013936
CGUGGUGGUGGGGGUGGGG	TCHO	0.196485	0.00454659	0.0457099	tca_miR_3897_3p_st	12	36204128
GGUGGGGUGGGGGGGUUGG	TCHO	0.196837	0.00447328	0.0452579	bta_miR_2888_st	14	120707919
GUGGGUUGGGGGCGGGGG	TCHO	0.198964	0.00405249	0.0425954	oan_miR_1346_st	1	11400988
UGGUGGAGAUGCCGGGGA	TCHO	0.199112	0.00402451	0.0424294	bta_miR_2898_st	9	116610086
AGGCAGGGGCUGGGCCUGCAGC	TCHO	0.199678	0.00391946	0.0417079	mmu_miR_346_star_st	14	94051846
GGCGGCGGCGGAGGCGGGGG	TCHO	0.20069	0.00373765	0.040333	hsa_miR_3960_st;mmu_miR_3960_st	1	302142706
CGGCGGCAGCGCCGGGGCG	TCHO	0.2007	0.00373591	0.040333	bta_miR_2885_st	17	66350524
CCCCAGGGCGACGCGGCGGG	TCHO	0.200821	0.00371468	0.0402229	hsa_miR_1915_st;ppy_miR_1915_st	12	1413346
GGGGCGGGGGGGCGGGUG	TCHO	0.202422	0.00344406	0.0382357	bta_miR_2881_st	12	12717988
CGGGACCGGGGUCCGGUGCG	TCHO	0.202792	0.00338403	0.0377346	bta_miR_2887_st	2	745919
AGGGGGCGGGCUCCGGCG	TCHO	0.205589	0.0029605	0.0345797	hsa_miR_4488_st	17	67586529
GGGUCCCGGGGAGGGGGG	TCHO	0.20581	0.00292918	0.0343146	hsa_miR_4281_st	1	304359153
GAGGGAGGGACGGGGGCGGUGC	TCHO	0.205943	0.00291051	0.0341508	mmu_miR_149_star_st	15	154447033
GGGGGGCAGGAGGGGCUCA	TCHO	0.206195	0.0028753	0.0338828	rno_miR_328a_star_st	6	25134132
GCGGGGCUGGGCGCGCG	TCHO	0.206425	0.00284361	0.0336249	hsa_miR_4508_st	16	81833047
GGCGGGUGCGGGGGUGG	TCHO	0.207872	0.00265103	0.0321924	hsa_miR_3656_st	2	2788698
AGGGGCGGGAGGGGUCGGGC	TCHO	0.208513	0.00256957	0.0315365	gga_miR_1607_st	2	339014
AAGGCGGCGGCGGCGGCCG	TCHO	0.208968	0.00251312	0.0311405	tca_miR_3885_5p_st	4	129213920
GUGGGGCCAGGCGGUGGUGG	TCHO	0.209039	0.00250442	0.0310941	mml_miR_1227_st	9	135420289
CGGGGCGGCAGGGGCCUC	TCHO	0.209138	0.00249235	0.0309972	hsa_miR_3196_st	13	216417897
CCCCGGGGAGCCCGGCG	TCHO	0.209183	0.00248691	0.0309456	hsa_miR_4532_st	7	4478538
CGGGCGUGGUGGUGGGGG	TCHO	0.209338	0.00246815	0.0308284	hsa_miR_1268_st	3	77713119
CGGCGCGACCGGCCCGGGG	TCHO	0.212548	0.00210694	0.0280358	hsa_miR_4634_st	14	28290047
UGGGGAGCGGCCCCCGGGCGGG	TCHO	0.213523	0.00200718	0.0272991	bta_miR_1343_st	2	28433229
GGGUGGUGGUGGAAGUCGGGG	TCHO	0.214941	0.00186984	0.0260776	ame_miR_3751_st	9	72425610
CGGGGGUGGCGGGGAGGGGG	TCHO	0.214983	0.00186583	0.0260384	bta_miR_2305_st	NW_003541294.1	709
AGAGCAGGGGCUGUGGGCUGCA	TCHO	0.217259	0.0016635	0.0241077	bta_miR_2442_st	6	82804454
UGCGGGGCUAGGGCUAACAGCA	TCHO	0.218622	0.00155219	0.0230211	bta_miR_744_st;hsa_miR_744_st;mmu_miR_744_st;ppy_miR_744_st;ptr_miR_744_st;ssc_miR_744_st	12	59358209	ssc-miR-744	MIMAT0015708
UGGGGCGGAGCUUCCGGAG	TCHO	0.219938	0.00145116	0.0221587	hsa_miR_3180_st	8	87201639
UCAAGAGCAAUAACGAAAAAUGU	TCHO	0.222127	0.00129636	0.0204474	cfa_miR_335_st;eca_miR_335_st;hsa_miR_335_st;mml_miR_335_st;mmu_miR_335_5p_st;ppy_miR_335_st;ptr_miR_335_st;rno_miR_335_st	18	19338043
CCCGGGGCGCCCGAGGGG	TCHO	0.222133	0.001296	0.0204474	oan_miR_1394_st	NW_003538861.2	34944
GUGGGUACGGCCCAGUGGGGGG	TCHO	0.234332	0.0006776	0.0132631	hsa_miR_1225_5p_st;ppy_miR_1225_5p_st	3	42283711
CGCGCCGGGCCCGGGUU	TCHO	0.234866	0.00065816	0.0130199	hsa_miR_3195_st	17	41206838
GGGGCGCGGCCGGAUCG	TCHO	0.235788	0.00062575	0.0126483	hsa_miR_3178_st	1	121361617
GCCGGCGGGAGCCCCAGGGAG	TCHO	0.247881	0.0003168	0.0078815	mmu_miR_2137_st	1	2924027
AGGGACGGGACGCGGUGCAGUG	TCHO	0.251078	0.00026313	0.00699407	hsa_miR_92b_star_st	4	103407151
GGGGACAGGGAUGGGUGUGGGG	TCHO	0.265944	0.00010747	0.00375676	sko_miR_4825_star_st	NW_003537559.2	33825
CUCCGGGACGGCUGGGC	TCHO	0.266612	0.0001031	0.00364884	hsa_miR_4497_st	13	109189893
UUCAAGUAAUUCAGGAUAGGUU	TG	-0.333344	1.17494e-06	0.00012676	bta_miR_26b_st;cfa_miR_26b_st	NW_003537647.2	56020
UAGCAGCACAUAAUGGUUUGU	TG	-0.333015	1.20556e-06	0.00012841	bta_miR_15a_st;cfa_miR_15a_st;gga_miR_15a_st;oan_miR_15a_st;ssc_miR_15a_st;tgu_miR_15a_st	NW_003613303.1	70425	ssc-miR-15a	MIMAT0007753
UCAGUGCAUGACAGAACUUGA	TG	-0.328028	1.77336e-06	0.00016914	pma_miR_152a_st	12	24289551
UGAGGUAGUAGUUUGUGCUGU	TG	-0.321071	3.00372e-06	0.00025643	gga_let_7i_st;mdo_let_7i_st;xtr_let_7i_st	5	30021229
UGAGGUAGUAGUUUGUACAGUU	TG	-0.317356	3.95904e-06	0.00031582	bta_let_7g_st;cfa_let_7g_st;eca_let_7g_st;hsa_let_7g_st;mml_let_7g_st;mmu_let_7g_st;oan_let_7g_st;ppy_let_7g_st;ptr_let_7g_st;ssc_let_7g_st;tgu_let_7g_st	13	37599007	ssc-let-7g	MIMAT0013867
UACAGUAGUCUGCACAUUGGUU	TG	-0.314421	4.91102e-06	0.00037586	dre_miR_199_star_st;ssc_miR_199b_star_st;xtr_miR_199a_star_st	9	126105259	ssc-miR-199b-3p	MIMAT0007760
UCGUACCGUGAGUAAUAAUGC	TG	-0.311405	6.11444e-06	0.00045064	dre_miR_126a_st;fru_miR_126_st;tni_miR_126_st;xtr_miR_126_st	1	313734714
CAGUAGUCUGCACAUUGGUUA	TG	-0.309525	7.00082e-06	0.00048979	pma_miR_199a_star_st;pma_miR_199b_star_st;ssc_miR_199a_star_st	1	302681832
UACAGUAGUCUGCACAUUGG	TG	-0.307984	7.81683e-06	0.0005343	bta_miR_199c_st;gga_miR_199_star_st	9	126105261
ACAGUAGUCUGCACAUUGGUU	TG	-0.302909	1.119e-05	0.00070388	cfa_miR_199_st;oan_miR_199_st;tgu_miR_199_3p_st	1	302681833
UACCCUGUAGAUCCGAAUUUGU	TG	-0.301508	1.23416e-05	0.00076312	cfa_miR_10_st;dpu_miR_10_st;dre_miR_10a_st;gga_miR_10a_st;isc_miR_10_st;lgi_miR_10_st;lmi_miR_10_st;oan_miR_10a_st;ssc_miR_10a_st;tca_miR_10_5p_st	12	24791317	ssc-miR-10a-5p	MIMAT0013884
UAGCAGCACAUAAUGGUUUGUU	TG	-0.300995	1.279e-05	0.00078205	mdo_miR_15a_st	NW_003613303.1	70425
ACAGUAGUCUGCACAUUGGUUA	TG	-0.299179	1.45059e-05	0.00085585	bta_miR_199a_3p_st;eca_miR_199b_3p_st;hsa_miR_199a_3p_st;hsa_miR_199b_3p_st;mml_miR_199a_3p_st;mmu_miR_199a_3p_st;mmu_miR_199b_st;ppy_miR_199a_3p_st;ptr_miR_199a_3p_st;ptr_miR_199b_st;rno_miR_199a_3p_st;ssc_miR_199a_3p_st	1	302681832	ssc-miR-199a-3p	MIMAT0013875
AUCACAUUGCCAGGGAUUU	TG	-0.297597	1.61766e-05	0.00093182	cfa_miR_23a_st	2	65581879
UAGCAGCACAGAAAUAUUGGCA	TG	-0.295596	1.855e-05	0.00103718	bta_miR_195_st;cfa_miR_195_st	12	54717330
UCAGUGCAUGACAGAACUUUGG	TG	-0.293566	2.12925e-05	0.00114514	dre_miR_152_st	12	24289550
UUAAUGCUAAUCGUGAUAGGGGU	TG	-0.293378	2.1565e-05	0.00115695	bta_miR_155_st;cfa_miR_155_st;eca_miR_155_st;hsa_miR_155_st;mml_miR_155_st;oan_miR_155_st;ppy_miR_155_st;ptr_miR_155_st	NW_003613383.1	133231
UGAGGUAGUAGUUUGUACAGU	TG	-0.29247	2.29289e-05	0.0012123	gga_let_7g_st;mdo_let_7g_st	13	37599007
AUCACAUUGCCAGGGAUUUC	TG	-0.291768	2.40371e-05	0.00125369	mdo_miR_23a_st	2	65581879
UACCCUGUAGAUCCGAAUUUGUG	TG	-0.291443	2.45678e-05	0.00127887	age_miR_10a_st;bfl_miR_10a_st;bta_miR_10a_st;eca_miR_10a_st;ggo_miR_10a_st;hsa_miR_10a_st;mdo_miR_10a_st;mml_miR_10a_st;mmu_miR_10a_st;ppa_miR_10a_st;ptr_miR_10a_st;rno_miR_10a_5p_st;sko_miR_10_st;sla_miR_10a_st;xtr_miR_10a_st	12	24791316
UCAGUGCACUACAGAACUUUGU	TG	-0.290373	2.63937e-05	0.00134513	bta_miR_148a_st;cfa_miR_148a_st;eca_miR_148a_st;gga_miR_148a_st;hsa_miR_148a_st;mdo_miR_148_st;mml_miR_148a_st;mmu_miR_148a_st;oan_miR_148_st;ppy_miR_148a_st;ptr_miR_148a_st;ssc_miR_148a_st;tgu_miR_148_st;xtr_miR_148a_st	NW_003613146.1	80966	ssc-miR-148a-3p	MIMAT0002124
ACCCUGUAGAUCCGAAUUUGU	TG	-0.289338	2.82813e-05	0.00141335	aga_miR_10_st;ame_miR_10_st;api_miR_10_st;bmo_miR_10_st;dan_miR_10_st;der_miR_10_st;dgr_miR_10_st;dmo_miR_10_st;dpe_miR_10_st;dps_miR_10_st;dse_miR_10_st;dsi_miR_10_st;dvi_miR_10_st;dwi_miR_10_st;dya_miR_10_st;nlo_miR_10_st;nvi_miR_10_st	12	24791317
AACCCUGUAGAUCCGAAUUUGUG	TG	-0.289237	2.84714e-05	0.001418	spu_miR_10_st	12	24791316
UUAAUGCUAAUUGUGAUAGGGGU	TG	-0.288376	3.015e-05	0.00148137	mmu_miR_155_st	NW_003613383.1	133231
AUCACAUUGCCAGGGAUUA	TG	-0.285426	3.66275e-05	0.00170583	cfa_miR_23b_st	10	31341126
CAAAGUGCUCAUAGUGCAGGUAG	TG	-0.282957	4.30384e-05	0.00193443	eca_miR_20b_st;gga_miR_20b_st;hsa_miR_20b_st;mml_miR_20b_st;mmu_miR_20b_st;oan_miR_20b_st;ppy_miR_20b_st;ptr_miR_20b_st;rno_miR_20b_5p_st;tgu_miR_20b_st;xla_miR_20_st;xtr_miR_20b_st	X	126199822
UAAAGUGCUUAUAGUGCAGGUA	TG	-0.281396	4.76225e-05	0.00209319	age_miR_20_st;ggo_miR_20_st;lca_miR_20_st;lla_miR_20_st;mml_miR_20a_st;mne_miR_20_st;ppa_miR_20_st;ppy_miR_20_st;ptr_miR_20a_st;sla_miR_20_st;ssc_miR_20_st	11	66610520	ssc-miR-20a	MIMAT0002129
UAGCAGCACAGAAAUAUUGGC	TG	-0.281374	4.769e-05	0.00209379	eca_miR_195_st;ggo_miR_195_st;hsa_miR_195_st;mml_miR_195_st;mmu_miR_195_st;ppa_miR_195_st;ppy_miR_195_st;ptr_miR_195_st;rno_miR_195_st;ssc_miR_195_st	12	54717330	ssc-miR-195	MIMAT0013928
CGUACCGUGAGUAAUAAUGCG	TG	-0.281199	4.82328e-05	0.00211154	bta_miR_126_st	1	313734715
UUCAAGUAAUUCAGGAUAGGU	TG	-0.28062	5.00675e-05	0.0021723	hsa_miR_26b_st;mml_miR_26b_st;mmu_miR_26b_st;ppy_miR_26b_st;ptr_miR_26b_st;rno_miR_26b_st	NW_003537647.2	56020
UGAGGUAGUAGAUUGUAUAGUU	TG	-0.277238	6.21715e-05	0.00252667	bta_let_7f_st;cfa_let_7f_st;dre_let_7f_st;eca_let_7f_st;gga_let_7f_st;hsa_let_7f_st;mdo_let_7f_st;mml_let_7f_st;mmu_let_7f_st;oan_let_7f_st;ppy_let_7f_st;ptr_let_7f_st;rno_let_7f_st;ssc_let_7f_st;tgu_let_7f_st;xtr_let_7f_st	X	51801782	ssc-let-7f	MIMAT0002152
UAGCAGCACAAAAAUAUUGGCA	TG	-0.276698	6.43413e-05	0.00258179	mdo_miR_195_st	12	54717330
UGGAAGACUAGUGAUUUUGUUGUU	TG	-0.275004	7.16171e-05	0.00279684	bta_miR_7_st;lgi_miR_7_st;ssc_miR_7_st	10	35113363	ssc-miR-7	MIMAT0002141
UAAUACUGCCUGGUAAUGAUGA	TG	-0.272332	8.4687e-05	0.00317084	csa_miR_200_st;dre_miR_200b_st;eca_miR_200b_st;fru_miR_200b_st;hsa_miR_200b_st;mdo_miR_200b_st;mmu_miR_200b_st;tni_miR_200b_st	6	58064346
UGAGGUAGUAGUUUGUGCUGUU	TG	-0.27016	9.69288e-05	0.00348673	bta_let_7i_st;dre_let_7i_st;fru_let_7i_st;hsa_let_7i_st;mml_let_7i_st;mmu_let_7i_st;ppy_let_7i_st;ptr_let_7i_st;rno_let_7i_st;tgu_let_7i_st;tni_let_7i_st	5	30021229
UUGUGCUUGAUCUAACCAUGUG	TG	-0.267901	0.0001114	0.00386455	bta_miR_218_st;dre_miR_218a_st;fru_miR_218a_st;pma_miR_218a_st;ssc_miR_218b_st;tni_miR_218a_st	8	15443814	ssc-miR-218b	MIMAT0020589
UAGCACCAUUUGAAAUCGGUU	TG	-0.266977	0.00011789	0.00400065	gga_miR_29a_st;oan_miR_29a_st;tgu_miR_29a_st;xtr_miR_29a_st	9	148553050
UUCACAGUGGCUAAGUUCCG	TG	-0.264235	0.00013928	0.00449645	bta_miR_27a_3p_st;cfa_miR_27a_st	2	65582068
UAGCAGCACGUAAAUAUUGGAG	TG	-0.259401	0.00018604	0.00548821	dre_miR_16b_st;fru_miR_16_st;tgu_miR_16b_st;tni_miR_16_st	NW_003613303.1	70565
ACCCUGUAGAUCCGAAUUUGUU	TG	-0.256843	0.00021637	0.00608356	aae_miR_10_st	12	24791316
CUUUCAGUCGGAUGUUUGCAG	TG	-0.252182	0.00028376	0.00734411	tgu_miR_30b_3p_st	1	57750761
UGAGGUAGUAGUUUGUGCU	TG	-0.249161	0.00033736	0.00824629	ssc_let_7i_st	5	30021229	ssc-let-7i	MIMAT0002153
UAGCAGCACGUAAAUAUUGG	TG	-0.247317	0.00037456	0.00884905	ppy_miR_16_st	13	108388297
CUUUCAGUCGGAUGUUUACAGC	TG	-0.245816	0.0004076	0.00934718	cfa_miR_30e_st;hsa_miR_30e_star_st;mmu_miR_30e_star_st;oan_miR_30e_star_st;rno_miR_30e_star_st;ssc_miR_30e_3p_st;tgu_miR_30a_3p_st	6	157476663	ssc-miR-30e-3p	MIMAT0013873
UGAGAACUGAAUUCCAUGGGUU	TG	-0.245605	0.00041247	0.00941094	cfa_miR_146a_st;eca_miR_146a_st;gga_miR_146a_st;hsa_miR_146a_st;mdo_miR_146a_st;mml_miR_146a_st;mmu_miR_146a_st;ppy_miR_146a_st;ptr_miR_146a_st;rno_miR_146a_st;tgu_miR_146c_st	16	68394566	ssc-miR-146a-5p	MIMAT0022963
AUGACCUAUGAAUUGACAGCC	TG	-0.24033	0.00055276	0.0116396	dre_miR_192_st;fru_miR_192_st;tni_miR_192_st;xtr_miR_192_st	2	6416990
UAGCAGCACGUAAAUAUUGGC	TG	-0.23969	0.00057251	0.0119406	bta_miR_16b_st	NW_003613303.1	70565
CAACAAAUCACAGUCUGCCAU	TG	-0.238698	0.0006044	0.0123991	tgu_miR_7_star_st	10	35113405
UAGCAGCACGUAAAUAUUGGUG	TG	-0.236576	0.0006782	0.0132664	bta_miR_16a_st;dre_miR_16a_st;gga_miR_16_st;lca_miR_16_st;oan_miR_16b_st;tgu_miR_16a_st;xtr_miR_16a_st	13	108388297
UCAGUGCAUUACAGAACUUUGU	TG	-0.235851	0.00070527	0.0136112	dre_miR_148_st;fru_miR_148_st;tni_miR_148_st	18	51216078
UAGCUUAUCAGACUGAUGUUGA	TG	-0.233108	0.0008169	0.0150641	age_miR_21_st;cfa_miR_21_st;cgr_miR_21_st;eca_miR_21_st;gga_miR_21_st;ggo_miR_21_st;hsa_miR_21_st;mdo_miR_21_st;mml_miR_21_st;mmu_miR_21_st;mne_miR_21_st;oan_miR_21_st;ppa_miR_21_st;ppy_miR_21_st;ptr_miR_21_st;rno_miR_21_st;ssc_miR_21_st;tgu_miR_21_st	12	37340402	ssc-miR-21	MIMAT0002165
UCAGUGCAUGACAGAACUUGGG	TG	-0.230796	0.00092341	0.0163005	bta_miR_152_st;mdo_miR_152_st	12	24289550
UAGCUUAUCAGACUGAUGUUGACU	TG	-0.229686	0.00097896	0.0169546	bta_miR_21_st	12	37340402
ACAGUAUUCUGCACAUUGGUUA	TG	-0.229514	0.00098786	0.0170404	ppy_miR_199b_3p_st	1	302681832
GACCCGUAGAUCCGAACUUGUG	TG	-0.229325	0.0009977	0.0171738	api_miR_100_st;nve_miR_100_st	9	54383425
UCGUACCGUGAGUAAUAAUGCGC	TG	-0.22808	0.00106478	0.0179423	gga_miR_126_st	1	313734714
UUAAGACUUGCAGUGAUGUUU	TG	-0.227222	0.00111342	0.0184774	eca_miR_499_5p_st;rno_miR_499_st	17	43571160	ssc-miR-499-5p	MIMAT0013877
CCGUCCUAAGGUUGUUGAGUU	TG	-0.22666	0.0011464	0.0188441	ssc_miR_676_3p_st	X	63280973	ssc-miR-676-3p	MIMAT0013943
AUCACAUUGCCAGGGAUAACCA	TG	-0.225616	0.00120997	0.0194957	oan_miR_23b_st	10	31341123
UCAGUGCAUCACAGAACUUUGU	TG	-0.224226	0.00129969	0.0204741	bta_miR_148b_st;cfa_miR_148b_st;eca_miR_148b_3p_st;hsa_miR_148b_st;mml_miR_148b_st;mmu_miR_148b_st;ppy_miR_148b_st;ptr_miR_148b_st;rno_miR_148b_3p_st;ssc_miR_148b_st;xtr_miR_148b_st	5	20388239	ssc-miR-148b-3p	MIMAT0013901
UAAUACUGCCUGGUAAUGAUG	TG	-0.219552	0.00164782	0.0239848	bta_miR_200b_st	6	58064346
AACCCGUAGAUCCGAACUUGU	TG	-0.219411	0.0016595	0.0240641	mdo_miR_100_st;tgu_miR_100_st	9	54383426
UAGCACCAUUUGAAAUCGGUUA	TG	-0.218068	0.00177499	0.0252045	bta_miR_29c_st;cfa_miR_29c_st;dre_miR_29a_st;eca_miR_29c_st;fru_miR_29a_st;hsa_miR_29c_st;mml_miR_29c_st;mmu_miR_29c_st;ppy_miR_29c_st;ptr_miR_29c_st;rno_miR_29c_st;ssc_miR_29c_st;tni_miR_29a_st	9	148553050	ssc-miR-29c	MIMAT0002166
UUCAAGUAAUCCAGGAUAGGUU	TG	-0.216272	0.00194091	0.0267499	dre_miR_26b_st;pma_miR_26b_st	NW_003540770.1	40653
UGAGGUAGUAAGUUGUAUUGUU	TG	-0.215933	0.00197374	0.0270189	age_miR_98_st;bta_miR_98_st;cfa_miR_98_st;eca_miR_98_st;ggo_miR_98_st;hsa_miR_98_st;mml_miR_98_st;mmu_miR_98_st;oan_miR_98_st;ppa_miR_98_st;ppy_miR_98_st;ptr_miR_98_st;rno_miR_98_st;ssc_miR_98_st;xtr_miR_98_st	X	51800919	ssc-miR-98	MIMAT0013905
UAAUACUGCCUGGUAAUGAUGAU	TG	-0.214753	0.0020921	0.0279488	gga_miR_200b_st;oan_miR_200b_st;tgu_miR_200b_st	6	58064346
UGUAAACAUCCUACACUCUCAG	TG	-0.211882	0.00240736	0.0304067	dre_miR_30c_st	1	57721737
AUGACCUAUGAAAUGACAGCC	TG	-0.20977	0.00266626	0.0323244	xtr_miR_215_st	1	191198893
UAAAGUGCUUAUAGUGCAGG	TG	-0.208479	0.00283678	0.0335645	oan_miR_20a_st	11	66610520
AACCCGUAGAUCCGAACUUGUG	TG	-0.208331	0.0028569	0.0337297	aae_miR_100_st;aga_miR_100_st;age_miR_100_st;ame_miR_100_st;bma_miR_100b_st;bmo_miR_100_st;bta_miR_100_st;cqu_miR_100_st;dre_miR_100_st;eca_miR_100_st;fru_miR_100_st;gga_miR_100_st;ggo_miR_100_st;hsa_miR_100_st;lgi_miR_100_st;lla_miR_100_st;mml_miR_100_st;mmu_miR_100_st;nvi_miR_100_st;oan_miR_100_st;pma_miR_100a_st;ppa_miR_100_st;ppy_miR_100_st;ptr_miR_100_st;rno_miR_100_st;sko_miR_100_st;sla_miR…	9	54383425	ssc-miR-100	MIMAT0013911
UAGCAGCACAUAAUGGUUUGUG	TG	-0.205877	0.00321058	0.0365452	age_miR_15a_st;eca_miR_15a_st;ggo_miR_15a_st;hsa_miR_15a_st;lca_miR_15a_st;lla_miR_15a_st;mml_miR_15a_st;mmu_miR_15a_st;mne_miR_15a_st;ppa_miR_15a_st;ppy_miR_15a_st;ptr_miR_15a_st;sla_miR_15a_st;xtr_miR_15a_st	NW_003613303.1	70425
UUCCCUUUGUCAUCCUAUGCCU	TG	-0.205584	0.00325541	0.0368417	bta_miR_204_st;cfa_miR_204_st;dre_miR_204_st;eca_miR_204b_st;fru_miR_204_st;gga_miR_204_st;gga_miR_211_st;ggo_miR_204_st;hsa_miR_204_st;mdo_miR_204_st;mml_miR_204_st;mmu_miR_204_st;mne_miR_204_st;oan_miR_204_st;pma_miR_204_st;ppa_miR_204_st;ppy_miR_204_st;ptr_miR_204_st;rno_miR_204_st;sla_miR_204_st;ssc_miR_204_st;tgu_miR_204_st;tni_miR_204a_st;xtr_miR_204_st	1	250527073	ssc-miR-204	MIMAT0002164
UAAUACUGCCUGGUAAUGAUGAC	TG	-0.204012	0.00350552	0.0386853	rno_miR_200b_st	6	58064346
UUCACAGUGGCUAAGUUCUGC	TG	-0.200962	0.00404066	0.0425528	bta_miR_27b_st;cfa_miR_27b_st;eca_miR_27b_st;gga_miR_27b_st;hsa_miR_27b_st;mdo_miR_27b_st;mml_miR_27b_st;mmu_miR_27b_st;oan_miR_27b_st;pma_miR_27b_st;ppy_miR_27b_st;ptr_miR_27b_st;rno_miR_27b_st;ssc_miR_27b_st;tgu_miR_27_st;xtr_miR_27b_st	10	31340888	ssc-miR-27b-3p	MIMAT0013890
UGAGAACUGAAUUCCACGGGUU	TG	-0.199442	0.00433394	0.0443608	oan_miR_146a_st	16	68488139
UAGCAGCACGUAAAUAUUGGAGU	TG	-0.19934	0.0043542	0.0445038	pma_miR_16_st	NW_003613303.1	70565
UCGUACCGUGAGUAAUAAAGC	TG	-0.198544	0.00451602	0.045522	cin_miR_126_st;csa_miR_126_st	1	313734714
AACCCGUAAAUCCGAACUUGUG	TG	-0.198275	0.00457184	0.045905	dan_miR_100_st;der_miR_100_st;dgr_miR_100_st;dme_miR_100_5p_st;dmo_miR_100_st;dse_miR_100_st;dsi_miR_100_st;dvi_miR_100_st;dwi_miR_100_st;dya_miR_100_st	9	54383425
AGGAGCUCACAGUCUAUUGA	TG	-0.197463	0.00474426	0.0470429	mmu_miR_28c_st	NW_003613102.1	169163
AUGACCUAUGAAUUGACAGACA	TG	-0.19686	0.0048761	0.0478176	bta_miR_215_st;mdo_miR_215_st	10	11963168
AACCCGUAGAUCCGAACUUGUGU	TG	-0.195898	0.00509336	0.0491572	bfl_miR_100_st;dpu_miR_100_st;isc_miR_100_st	9	54383424
UGAGAACUGAAUUCCAUAGGCUGU	TG	-0.195679	0.00514393	0.0494021	bta_miR_146b_st;rno_miR_146b_st	14	123301772
UUGGGGCUGGGCUGGGGGCA	TG	0.195394	0.00521044	0.049804	bta_miR_1584_st	6	152494278
CUGGGUUGGGCUGGGCUGGG	TG	0.195811	0.00511324	0.0492514	hsa_miR_4507_st	6	81647492
AGCAGCAUUGUACAGGGCUUU	TG	0.195978	0.00507492	0.0490767	dre_miR_107b_st	16	59912666
AAAAGUGCUUACAGUGCAGGUAGC	TG	0.198393	0.00454718	0.0457099	age_miR_106a_st;ggo_miR_106a_st;mml_miR_106a_st;mne_miR_106a_st;ppa_miR_106a_st;ppy_miR_106a_st;ptr_miR_106a_st;sla_miR_106a_st;ssc_miR_106a_st	X	126200228	ssc-miR-106a	MIMAT0002118
AUGGAUGGGGGUGAGGGGUGCA	TG	0.198493	0.00452644	0.0455956	bta_miR_2392_st	8	941546
CAAAGUGCUUACAGUGCAGGUAGU	TG	0.198995	0.00442369	0.0449745	age_miR_17_5p_st;bta_miR_17_5p_st;gga_miR_17_5p_st;ggo_miR_17_5p_st;lca_miR_17_5p_st;lla_miR_17_5p_st;mdo_miR_17_5p_st;mml_miR_17_5p_st;mne_miR_17_5p_st;ppa_miR_17_5p_st;ppy_miR_17_5p_st;ptr_miR_17_5p_st;sla_miR_17_5p_st;xtr_miR_17_5p_st	11	66610069
CGGCGGCAGCGCCGGGGCG	TG	0.199243	0.00437357	0.0446303	bta_miR_2885_st	17	66350524
UAUUGCACUUGUCCCGGCCUGC	TG	0.200323	0.00416167	0.0433371	sko_miR_92b_st;spu_miR_92b_st	11	66610809
UGGGGAGCGGCCCCCGGGCGGG	TG	0.20043	0.00414107	0.0432012	bta_miR_1343_st	2	28433229
CGUGGUGGUGGGGGUGGGG	TG	0.200791	0.0040727	0.0427258	tca_miR_3897_3p_st	12	36204128
GUGGGGCCAGGCGGUGGUGG	TG	0.201209	0.00399466	0.0421799	mml_miR_1227_st	9	135420289
AGCAGCAUUGUACAGGGCUAU	TG	0.201479	0.00394497	0.041837	cfa_miR_107_st	16	59912666
CCCGGGGCGCCCGAGGGG	TG	0.201561	0.00393	0.0417591	oan_miR_1394_st	NW_003538861.2	34944
AGUGAGGAGGCCGGGGCCGCU	TG	0.201738	0.00389783	0.0415353	osa_miR1846a_5p_st;osa_miR1846b_5p_st;osa_miR1846c_5p_st	12	3767152
GGGGCCUGGCGGUGGGCGG	TG	0.202071	0.00383797	0.0411106	hsa_miR_2861_st	10	45386429
CCGGGUGGGGCUGGGCUGGG	TG	0.202173	0.00381981	0.0409962	gga_miR_1584_st	NW_003539576.1	60607
AAAAGCUGGGUUGAGAGGGCGA	TG	0.20349	0.0035922	0.0393838	bta_miR_320_st;cfa_miR_320_st;hsa_miR_320a_st;mml_miR_320_st;mmu_miR_320_st;ppy_miR_320a_st;ptr_miR_320a_st;rno_miR_320_st	14	6954950
AUCUCGCUGGGGCCUCCA	TG	0.204845	0.0033709	0.0376526	mmu_miR_720_st	1	311967694
CUGGAGCGCGCGGGCGAGGCAGGC	TG	0.20509	0.00333217	0.0374136	mmu_miR_5130_st	11	53669691
GGGUGGUGGUGGAAGUCGGGG	TG	0.205364	0.00328941	0.0371048	ame_miR_3751_st	9	72425610
CUGGGAGGUGGAUGUUUACUUC	TG	0.205657	0.00324418	0.0367746	hsa_miR_30b_star_st	4	6717691
CGGGACCGGGGUCCGGUGCG	TG	0.207045	0.00303757	0.0351331	bta_miR_2887_st	2	745919
AGGGACGGGACGCGGUGCAGUGUU	TG	0.209162	0.00274545	0.0329351	rno_miR_92b_star_st;ssc_miR_92b_5p_st	4	103407149	ssc-miR-92b-5p	MIMAT0017377
GCGGGAUGGGCUGGGCCGGG	TG	0.209555	0.00269403	0.0325349	tgu_miR_2974_st	7	33141017
GGGGGGCAGGAGGGGCUCA	TG	0.21279	0.00230333	0.0295272	rno_miR_328a_star_st	6	25134132
CGGGAGGGGAGGGAGGGCGGG	TG	0.214044	0.00216618	0.0284443	gga_miR_2127_st	NW_003613477.1	122032
CGGGUGAGGGCGGUGGGGGA	TG	0.214557	0.00211234	0.0280735	gga_miR_1790_st	7	2238825
GGGGGGCAGGAGGGGCUCAGGG	TG	0.214793	0.00208789	0.0279351	mmu_miR_328_star_st	6	25134129
CCCCAGGGCGACGCGGCGGG	TG	0.215936	0.0019734	0.0270189	hsa_miR_1915_st;ppy_miR_1915_st	12	1413346
AUCCCACCACUGCCACCAU	TG	0.216066	0.00196076	0.0268917	hsa_miR_1260b_st	14	12588283
CGGGCGUGGUGGUGGGGG	TG	0.218458	0.00174072	0.024863	hsa_miR_1268_st	3	77713119
UAUUGCACUUGUCCCGGCCUGU	TG	0.219233	0.00167446	0.0241974	age_miR_92_st;bta_miR_92_st;bta_miR_92a_st;cfa_miR_92a_st;dre_miR_92a_st;eca_miR_92a_st;fru_miR_92_st;ggo_miR_92_st;hsa_miR_92a_st;lca_miR_92_st;lla_miR_92_st;mml_miR_92a_st;mne_miR_92_st;oan_miR_92a_st;ppa_miR_92_st;ppy_miR_92_st;ptr_miR_92_st;sla_miR_92_st;ssc_miR_92a_st;tgu_miR_92_st;tni_miR_92_st	X	126199520	ssc-miR-92a	MIMAT0013908
GGGUCCCGGGGAGGGGGG	TG	0.2214	0.00150112	0.0226061	hsa_miR_4281_st	1	304359153
CACGGCCGCCGCCGGGCGCC	TG	0.221632	0.00148352	0.0224337	ssc_miR_4332_st	6	870456	ssc-miR-4332	MIMAT0017962
UCGAAUCCCAGCGGUGCCUCU	TG	0.222384	0.00142793	0.0219571	mmu_miR_5100_st	12	55878352
AGCAGCAUUGUACAGGGCUAUC	TG	0.225559	0.00121356	0.0195249	bta_miR_107_st;oan_miR_107_st	14	110407109
GGGAGAAGGGUCGGGGC	TG	0.226573	0.00115155	0.0188866	hsa_miR_4516_st	4	2796432
AGGGGGCGGGCUCCGGCG	TG	0.22726	0.00111122	0.0184542	hsa_miR_4488_st	17	67586529
CGGCGCGACCGGCCCGGGG	TG	0.227737	0.00108403	0.0181687	hsa_miR_4634_st	14	28290047
UGCAGGUGAUGGCGGGGCUG	TG	0.231501	0.00088969	0.0158715	gga_miR_1636_st	9	592436
UGUUGCGGACCAGGGGAAUCCGA	TG	0.232445	0.00084622	0.0153539	mmu_miR_5109_st	6	867910
CGGGGCGGCAGGGGCCUC	TG	0.233179	0.00081382	0.01502	hsa_miR_3196_st	13	216417897
GAGGGAGGGACGGGGGCGGUGC	TG	0.234683	0.00075097	0.0142132	mmu_miR_149_star_st	15	154447033
AGGCGGGCCGGGGUUGGA	TG	0.23506	0.00073592	0.013998	bta_miR_2899_st	1	153888808
AGCUACAUCUGGCUACUGGGUCUC	TG	0.235335	0.00072512	0.0138561	age_miR_222_st;dre_miR_222_st;fru_miR_222_st;gga_miR_222_st;mdo_miR_222a_st;ssc_miR_222_st;tgu_miR_222_st;tni_miR_222_st;xtr_miR_222_st	X	45275619	ssc-miR-222	MIMAT0013942
UUGGGGCUGGGGAGAGGCGGG	TG	0.236119	0.00069514	0.0134535	bta_miR_2374_st	2	84019374
AGCAGCAUUGUACAGGGCUAUCA	TG	0.236237	0.00069074	0.013404	dre_miR_107_st;eca_miR_107b_st;fru_miR_107_st;gga_miR_107_st;ggo_miR_107_st;hsa_miR_107_st;lla_miR_107_st;mdo_miR_107_st;mml_miR_107_st;mmu_miR_107_st;mne_miR_107_st;ppa_miR_107_st;ppy_miR_107_st;ptr_miR_107_st;rno_miR_107_st;ssc_miR_107_st;tgu_miR_107_st;tni_miR_107_st;xtr_miR_107_st	14	110407108	ssc-miR-107	MIMAT0002155
GGGGCCUGGCGGCGGGCGG	TG	0.237326	0.00065122	0.0129646	mmu_miR_2861_st	NW_003539295.2	46470
UCUCGCUGGGGCCUCCA	TG	0.237424	0.00064775	0.0129131	hsa_miR_720_st;ptr_miR_720_st	2	16007497
GCGGAGCGGAGCGGAGCGGGG	TG	0.239345	0.00058342	0.0120818	tgu_miR_2976_st	3	10645928
CCGGGCCGGGCGGGCGGG	TG	0.240793	0.00053887	0.011391	tgu_miR_2981_st	6	74545310
UGUAAACAUCCCCGACUGGAAGCU	TG	0.241618	0.00051494	0.0110342	bta_miR_30d_st;cfa_miR_30d_st;ssc_miR_30d_st;tgu_miR_30d_5p_st	4	6713525	ssc-miR-30d	MIMAT0013871
AGGGAGGGACGGGGGCUGUGC	TG	0.241674	0.00051334	0.0110108	hsa_miR_149_star_st	15	154447033
AGGGCGGGCGGCGACUGGAA	TG	0.241909	0.00050672	0.0109061	bta_miR_2900_st	7	106069936
GAGACUGGGGUGGGGCC	TG	0.244149	0.00044745	0.00996372	hsa_miR_4463_st	15	39299444
GUGGGUGGGGGCAUCUCGGA	TG	0.246477	0.00039272	0.00913126	mml_miR_1230_st	2	141010219
GUGGGUUGGGGCGGGCUCUG	TG	0.249809	0.00032512	0.0080142	hsa_miR_3940_5p_st	10	20142288
GGUGGGGUGGGGGGGUUGG	TG	0.251927	0.00028795	0.00738494	bta_miR_2888_st	14	120707919
AGCAGCAUUGUACAGGGCUAUGA	TG	0.25346	0.00026356	0.00699712	age_miR_103_st;bta_miR_103_st;cfa_miR_103_st;dre_miR_103_st;eca_miR_103_st;eca_miR_107a_st;fru_miR_103_st;gga_miR_103_st;ggo_miR_103_st;hsa_miR_103a_st;lla_miR_103_st;mdo_miR_103_st;mml_miR_103_st;mmu_miR_103_st;mne_miR_103_st;oan_miR_103_st;pma_miR_103b_st;ppa_miR_103_st;ppy_miR_103_st;ptr_miR_103_st;rno_miR_103_st;ssc_miR_103_st;tgu_miR_103_st;tni_miR_103_st;xtr_miR_103_st	17	36149798	ssc-miR-103	MIMAT0002154
CUCUAAGGGCUGGGCCGGUCGG	TG	0.25471	0.0002451	0.00664697	bta_miR_2487_st	7	11396203
GGCCGGGGGACGGGCUGGGA	TG	0.2553	0.00023682	0.00648781	peu_miR2911_st	12	46773536
GGGUGCGGGCCGGCGGGG	TG	0.257287	0.0002108	0.00598262	hsa_miR_4466_st	14	53692931
GGCGGGUGCGGGGGUGG	TG	0.257632	0.00020655	0.00589841	hsa_miR_3656_st	2	2788698
GGGGGCGGUGGGGGGCGGGG	TG	0.258229	0.00019941	0.00573574	bta_miR_1777b_st	6	827723
GUGGGCGGUGCGGGGCGGCG	TG	0.259973	0.00017983	0.0053576	gga_miR_1777_st	15	157557669
GGCGGCGGCGGAGGCGGGGG	TG	0.263242	0.00014788	0.00467426	hsa_miR_3960_st;mmu_miR_3960_st	1	302142706
GGGGCUGGGGCCGGGGCCGAGC	TG	0.26363	0.00014446	0.00460948	hsa_miR_762_st;ptr_miR_762_st	8	1092756
AAGGCGGCGGCGGCGGCCG	TG	0.263917	0.00014198	0.00455507	tca_miR_3885_5p_st	4	129213920
CUGCGGGGGAGGAGGGAGGGGG	TG	0.264455	0.00013744	0.00447366	gga_miR_1770_st	5	16184162
GUGGGUUGGGGGCGGGGG	TG	0.265757	0.00012699	0.00422774	oan_miR_1346_st	1	11400988
GGGGCUGGGCGCGCGCC	TG	0.26628	0.00012301	0.00411718	hsa_miR_4492_st	6	868261
CGCGCCGGGCCCGGGUU	TG	0.266501	0.00012137	0.00408082	hsa_miR_3195_st	17	41206838
UGGGGGCGGUGGGGGGCGGG	TG	0.267201	0.00011628	0.0039742	bta_miR_1777a_st	4	41993746
GCGGGCGGGGCCGGGGGCGGGG	TG	0.268852	0.00010508	0.00370099	mmu_miR_5126_st	6	58229492
AGCAGGUGCGGGGCGGCG	TG	0.270192	9.67372e-05	0.00348556	hsa_miR_3665_st	3	133836025
AGGGGCGGGAGGGGUCGGGC	TG	0.276831	6.38e-05	0.00256302	gga_miR_1607_st	2	339014
GGGGCGCGGCCGGAUCG	TG	0.276924	6.34223e-05	0.00255481	hsa_miR_3178_st	1	121361617
CGGGGGUGGCGGGGAGGGGG	TG	0.277522	6.10575e-05	0.00250045	bta_miR_2305_st	NW_003541294.1	709
GGGGCGGGGGGGCGGGUG	TG	0.278688	5.66784e-05	0.00237897	bta_miR_2881_st	12	12717988
UGUAAACAUCCCCGACUGGAAGC	TG	0.279001	5.55524e-05	0.00234069	oan_miR_30d_st	NW_003540667.2	160437
GCGGGGCUGGGCGCGCG	TG	0.280257	5.125e-05	0.0022018	hsa_miR_4508_st	16	81833047
AAGGGGGGGGGGGGAAAGA	TG	0.28173	4.66033e-05	0.00205458	osa_miR2919_st	16	25789138
GCCGGCGGGAGCCCCAGGGAG	TG	0.287411	3.21383e-05	0.0015478	mmu_miR_2137_st	1	2924027
CUCCGGGACGGCUGGGC	TG	0.317993	3.77685e-06	0.00030506	hsa_miR_4497_st	13	109189893
UGCGGGGCUAGGGCUAACAGCA	TG	0.336881	8.89655e-07	0.00010304	bta_miR_744_st;hsa_miR_744_st;mmu_miR_744_st;ppy_miR_744_st;ptr_miR_744_st;ssc_miR_744_st	12	59358209	ssc-miR-744	MIMAT0015708
